# Supplementary material for: Rapid metabolic shifts occur during the transition between hunger and satiety in Drosophila melanogaster
Source: PubMed Central journal article supplement (PMC6731244; doi:10.1038/s41467-019-11933-z), 2019-09-06
Supplement: 41467_2019_11933_MOESM1_ESM.pdf [file 41467_2019_11933_MOESM1_ESM.pdf]

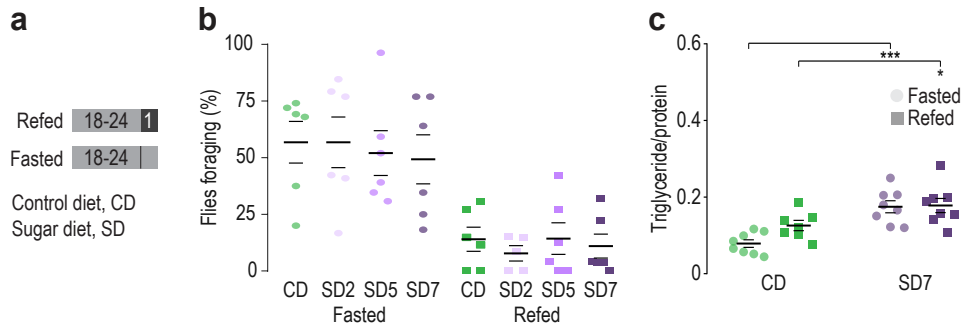

**Supplementary Fig. 1 The foraging behavior of fasted and refed flies on a control or high sugar diet.**

**a)** Schematic of feeding manipulations used in the manuscript. Flies were food deprived for 18-24 hr then given access to vials containing 1 % agar only (fasted, lighter gray) or 1 % agar with 400 mM D-Glucose agar (refed, black) for 1 hr. After this time, flies were immediately used for metabolomics, transcriptomics, or behavioral experiments as described in the Methods.

**b)** The foraging behavior of flies fed a control diet (CD, green), or high sugar diet (SD) for 2 days (SD2, lavender), 5 days (SD5, lighter purple), and 7 days (SD7, darker purple) and then fasted (lighter shades) or refed (darker shades) as shown in a). Data are mean (thicker line) +/- standard error of the mean (SEM, thinner lines) for this figure. Two-way ANOVA with Dunnett's test. n = 6 (biologically independent samples) vials of 21-27 age-matched male flies.

**c)** The triglyceride measurements normalized to protein of flies on a CD (green) and SD7 (darker purple) then fasted (lighter shades) or refed (darker shades). Data are mean +/- SEM for this panel. Two-way ANOVA with Sidak's test: \* p < 0.05, \*\*\* p < 5 x 10<sup>-4</sup>. SD7 flies and CD fasted n = 8 and CD refed n = 7 biologically independent animals. Source data are provided as a Source Data file.

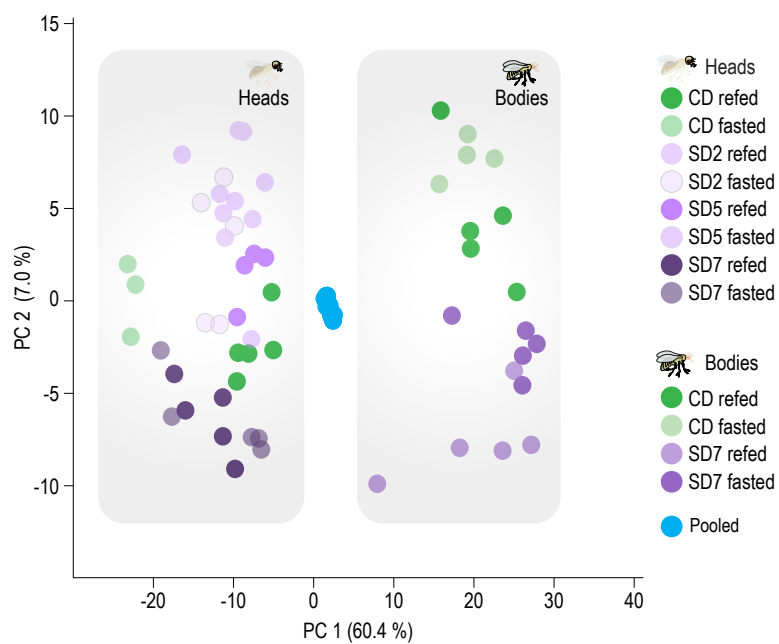

**Supplementary Fig. 2 Principal component analysis of metabolomics data.**

Projection onto the two most explanatory principal components for the fly head and body samples used in the metabolomics study. Control diet (CD, green shades); high sugar diet (SD2, SD5, or SD7 days, purple shades); pooled (blue) refers to samples that combined all the replicates shown. Percent variance is listed in parentheses.

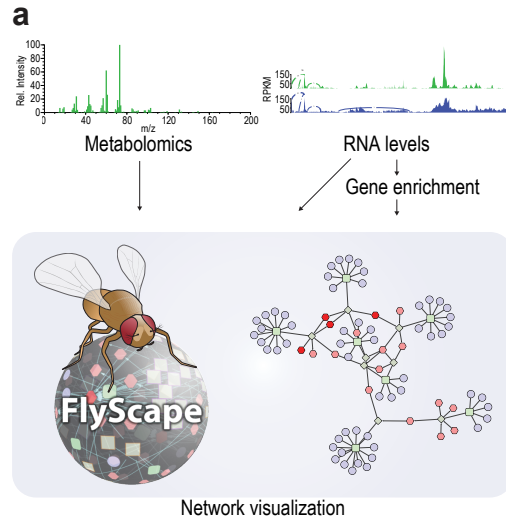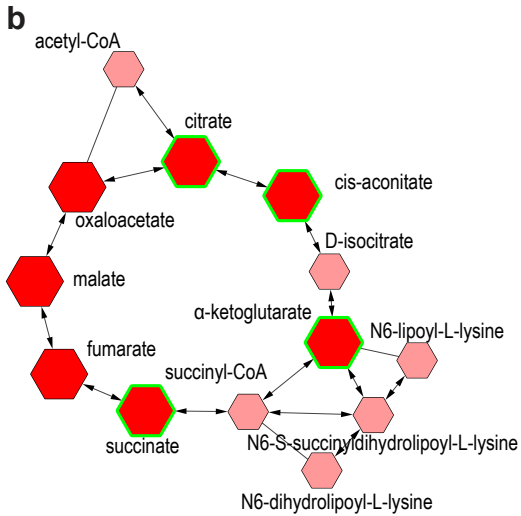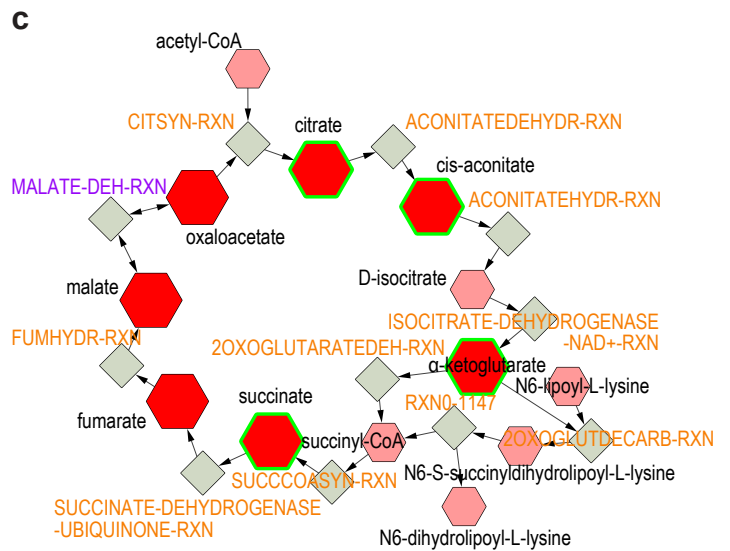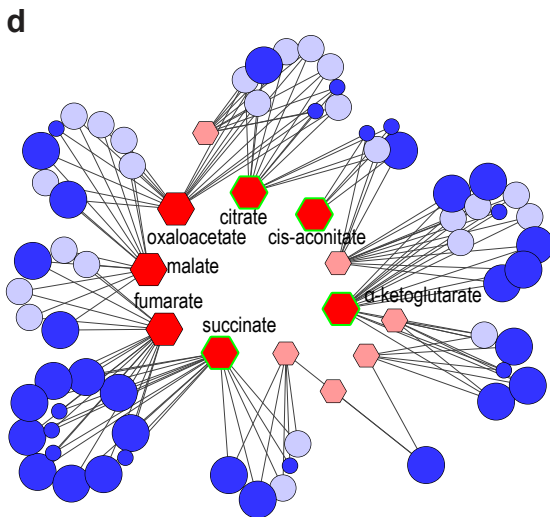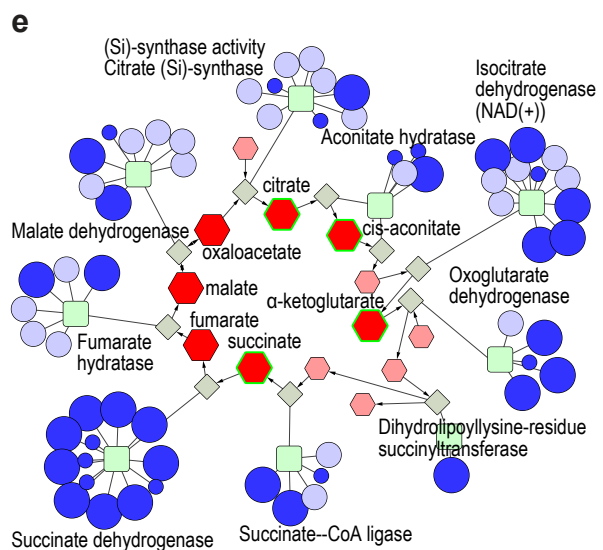

**Supplementary Fig. 3 Flyscape, a tool to map and visualize *Drosophila melanogaster* metabolic networks.**

**a)** Diagram of workflow that Flyscape uses to analyze metabolomic and transcriptomic data.

**b-e)** Examples of different Flyscape compound networks visualization where compounds are represented as nodes and reactions are represented as edges **(b)**, compound-reaction **(c)**, compound-gene **(d)**, and compound-reaction-enzyme-gene networks **(e)**. The size of the compound nodes (red hexagons) reflects changes in metabolite abundance (up or down), salmon-colored hexagons represent compounds that were not measured, the size of the gene nodes (blue circles) represents the magnitude of changes in RNA abundance (up or down), light blue circles are genes that were not measured, green squares represent the enzyme type, and the gray diamonds are reactions. Source data are provided in the Source Data file.

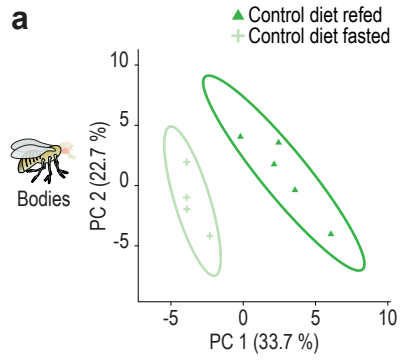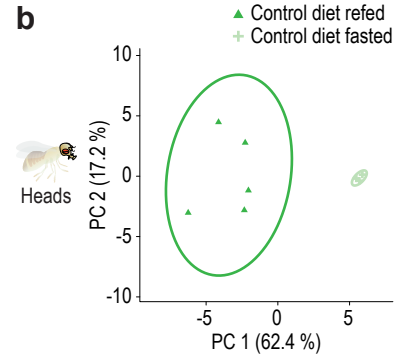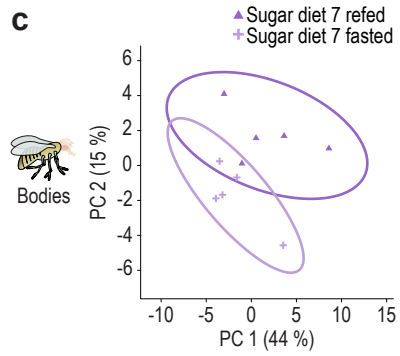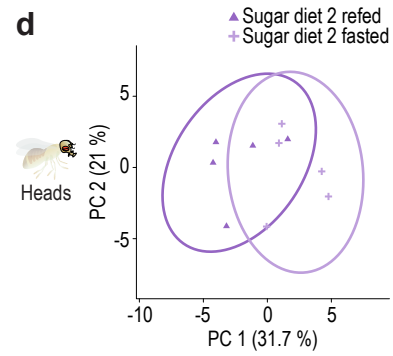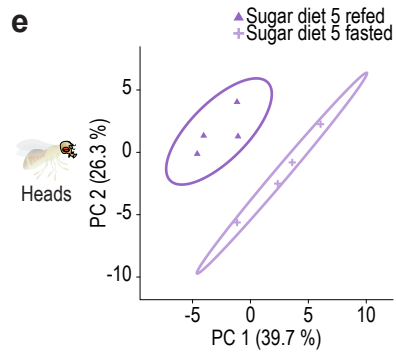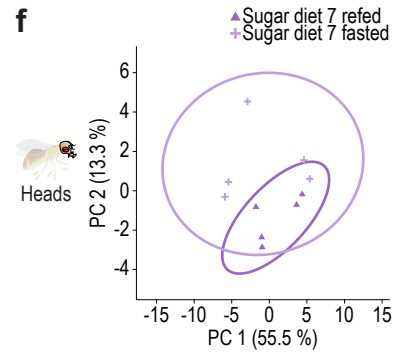

**Supplementary Fig. 4 Principal component analysis of metabolomics samples by tissue, feeding state, and diet.**

**a-f)** Projections onto the two strongest principal components for metabolomics samples **a)** refed and fasted bodies fed a control diet (CD), **b)** refed and fasted heads fed a CD, **c)** refed vs fasted bodies fed a high sugar diet (SD7), and refed and fasted heads fed a SD for **d)** 2 days (SD2), **e)** 5 days (SD5), or **f)** 7 days (SD7). Percent variance is listed in parentheses and the circles represent the 95 % confidence interval. Source data are provided in the Source Data file.



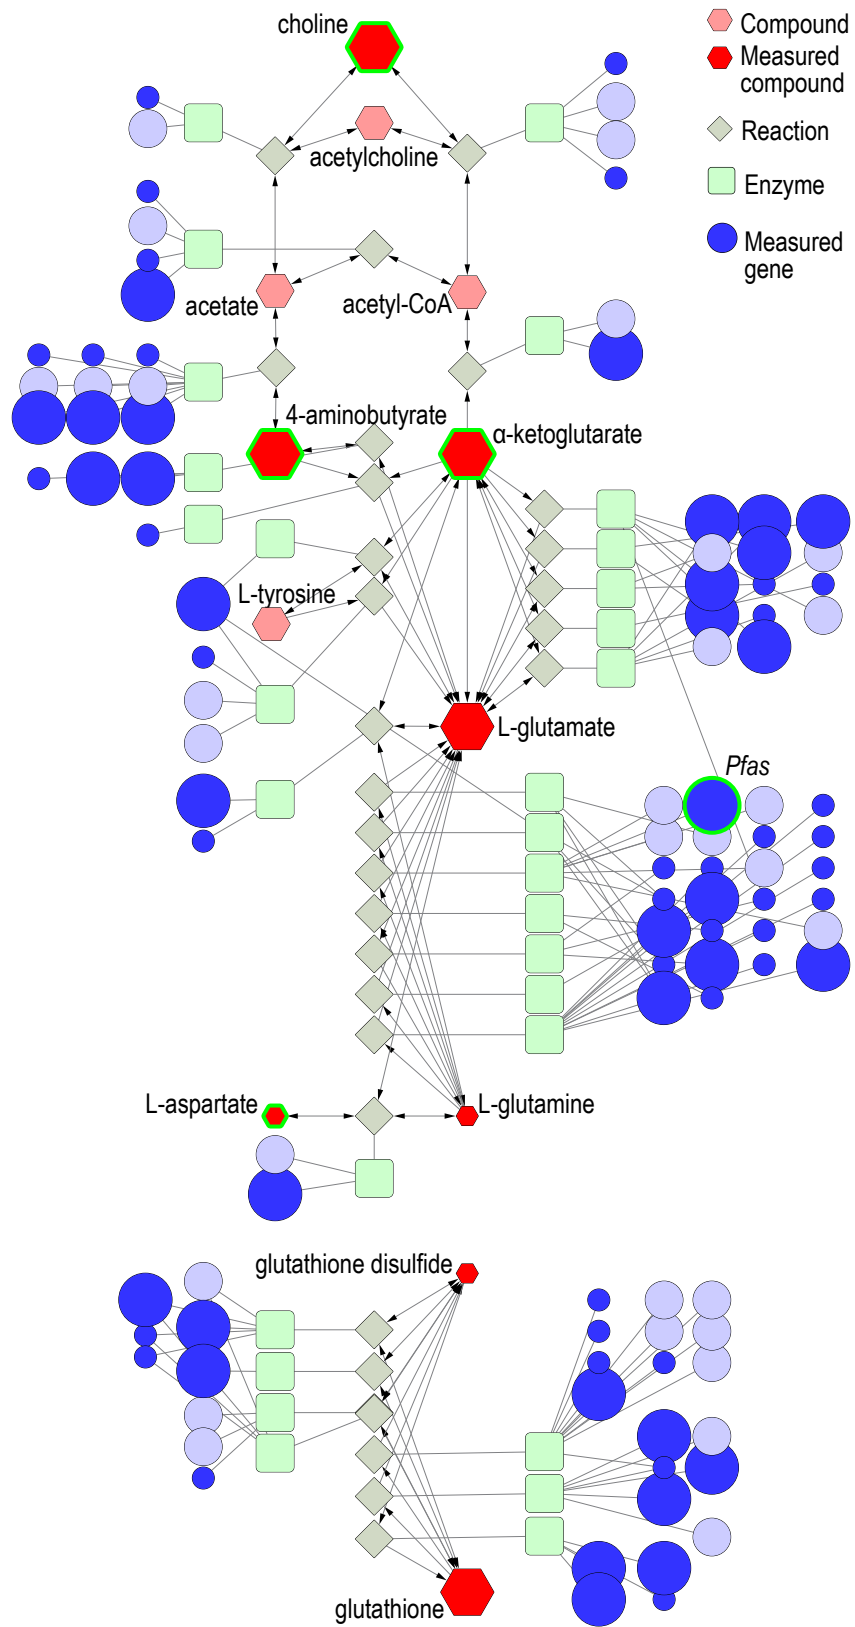

**Supplementary Fig. 5 The metabolite levels of neurotransmitter intermediates change between the fasted and refed states in fruit fly heads.**

Flyscape network showing changes in neurochemicals from the heads of refed and fasted flies fed a control diet. FDR < 0.1 by Welch's t test for metabolites and FDR < 0.05 by Wald test for RNA sequencing (green outlines). The size of the compound nodes (red hexagons) reflects changes in metabolite abundance (up or down) between fasted and refed fly heads, (salmon-colored hexagons represent compounds that were not measured), the size of the gene nodes (blue circles) represents the magnitude of changes in RNA abundance (up or down) between fasted and refed brains, light blue circles are genes that were not measured, green squares represent the enzyme type, and the gray diamonds are reactions. Source data are provided in the Source Data file.

**a**

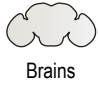

| Sample Name         | Condition           | % Aligned | M Aligned | Length | M Seqs |
|---------------------|---------------------|-----------|-----------|--------|--------|
| 91819_AGTGAG_S18_R1 | Control diet refed  | 79.6      | 11.2      | 38     | 14.1   |
| 91819_AGTGAG_S18_R2 | Control diet refed  |           |           | 38     | 14.1   |
| 91820_GCACTA_S19_R1 | Control diet sated  | 78.0      | 9.7       | 38     | 12.5   |
| 91820_GCACTA_S19_R2 | Control diet sated  |           |           | 38     | 12.5   |
| 91821_ACCTCA_S20_R1 | Control diet sated  | 75.2      | 9.6       | 38     | 12.8   |
| 91821_ACCTCA_S20_R2 | Control diet sated  |           |           | 38     | 12.8   |
| 91822_GTGCTT_S21_R1 | Control diet fasted | 74.0      | 9.2       | 38     | 12.4   |
| 91822_GTGCTT_S21_R2 | Control diet fasted |           |           | 38     | 12.4   |
| 91823_AAGCCT_S22_R1 | Control diet fasted | 72.6      | 9.1       | 38     | 12.5   |
| 91823_AAGCCT_S22_R2 | Control diet fasted |           |           | 38     | 12.5   |
| 91826_AGCATG_S25_R1 | Control diet refed  | 79.3      | 11        | 38     | 13.9   |
| 91826_AGCATG_S25_R2 | Control diet refed  |           |           | 38     | 13.9   |
| 91827_GAGTCA_S26_R1 | Control diet refed  | 79.6      | 9.9       | 38     | 12.5   |
| 91827_GAGTCA_S26_R2 | Control diet refed  |           |           | 38     | 12.5   |
| 91828_CGTAGA_S27_R1 | Control diet sated  | 79.4      | 11.1      | 38     | 14     |
| 91828_CGTAGA_S27_R2 | Control diet sated  |           |           | 38     | 14     |
| 91830_CACAGT_S29_R1 | Control diet fasted | 80.3      | 11        | 38     | 13.7   |
| 91830_CACAGT_S29_R2 | Control diet fasted |           |           | 38     | 13.7   |

**b**

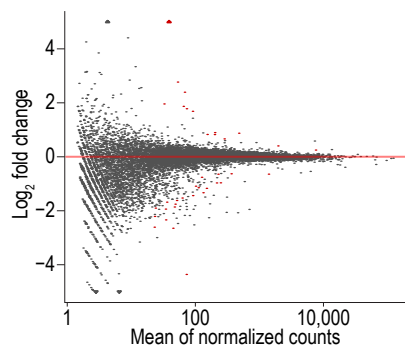

**c**

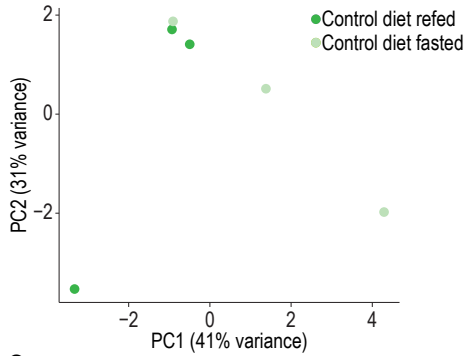

**d**

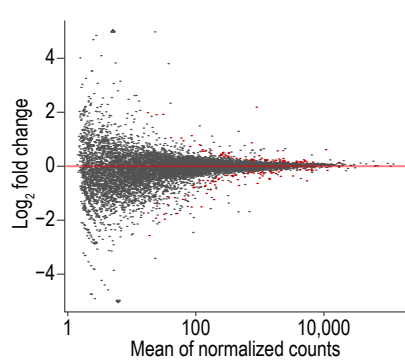

**e**

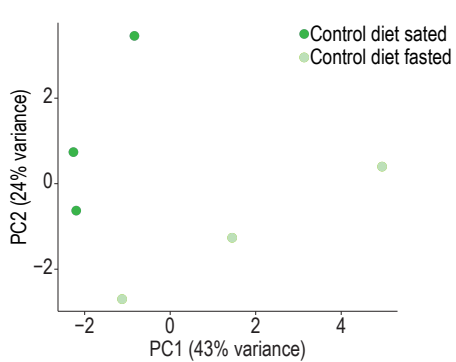

**Supplementary Fig. 6 Analysis of RNA-sequencing from the brains of fasted, refed, and sated flies.**

**a)** Summary of sequencing reads analysis by sample.

**b and d)** MA plots of the comparison between the brains of: **b)** fasted and refed flies, and **d)** fasted and sated flies. Red circles in MA plot  $FDR < 0.05$  by Wald test.

**c and e)** Projection onto the two most explanatory principal components for the fasted, refed, and sated RNA sequencing samples. Source data are provided as a Source Data file.

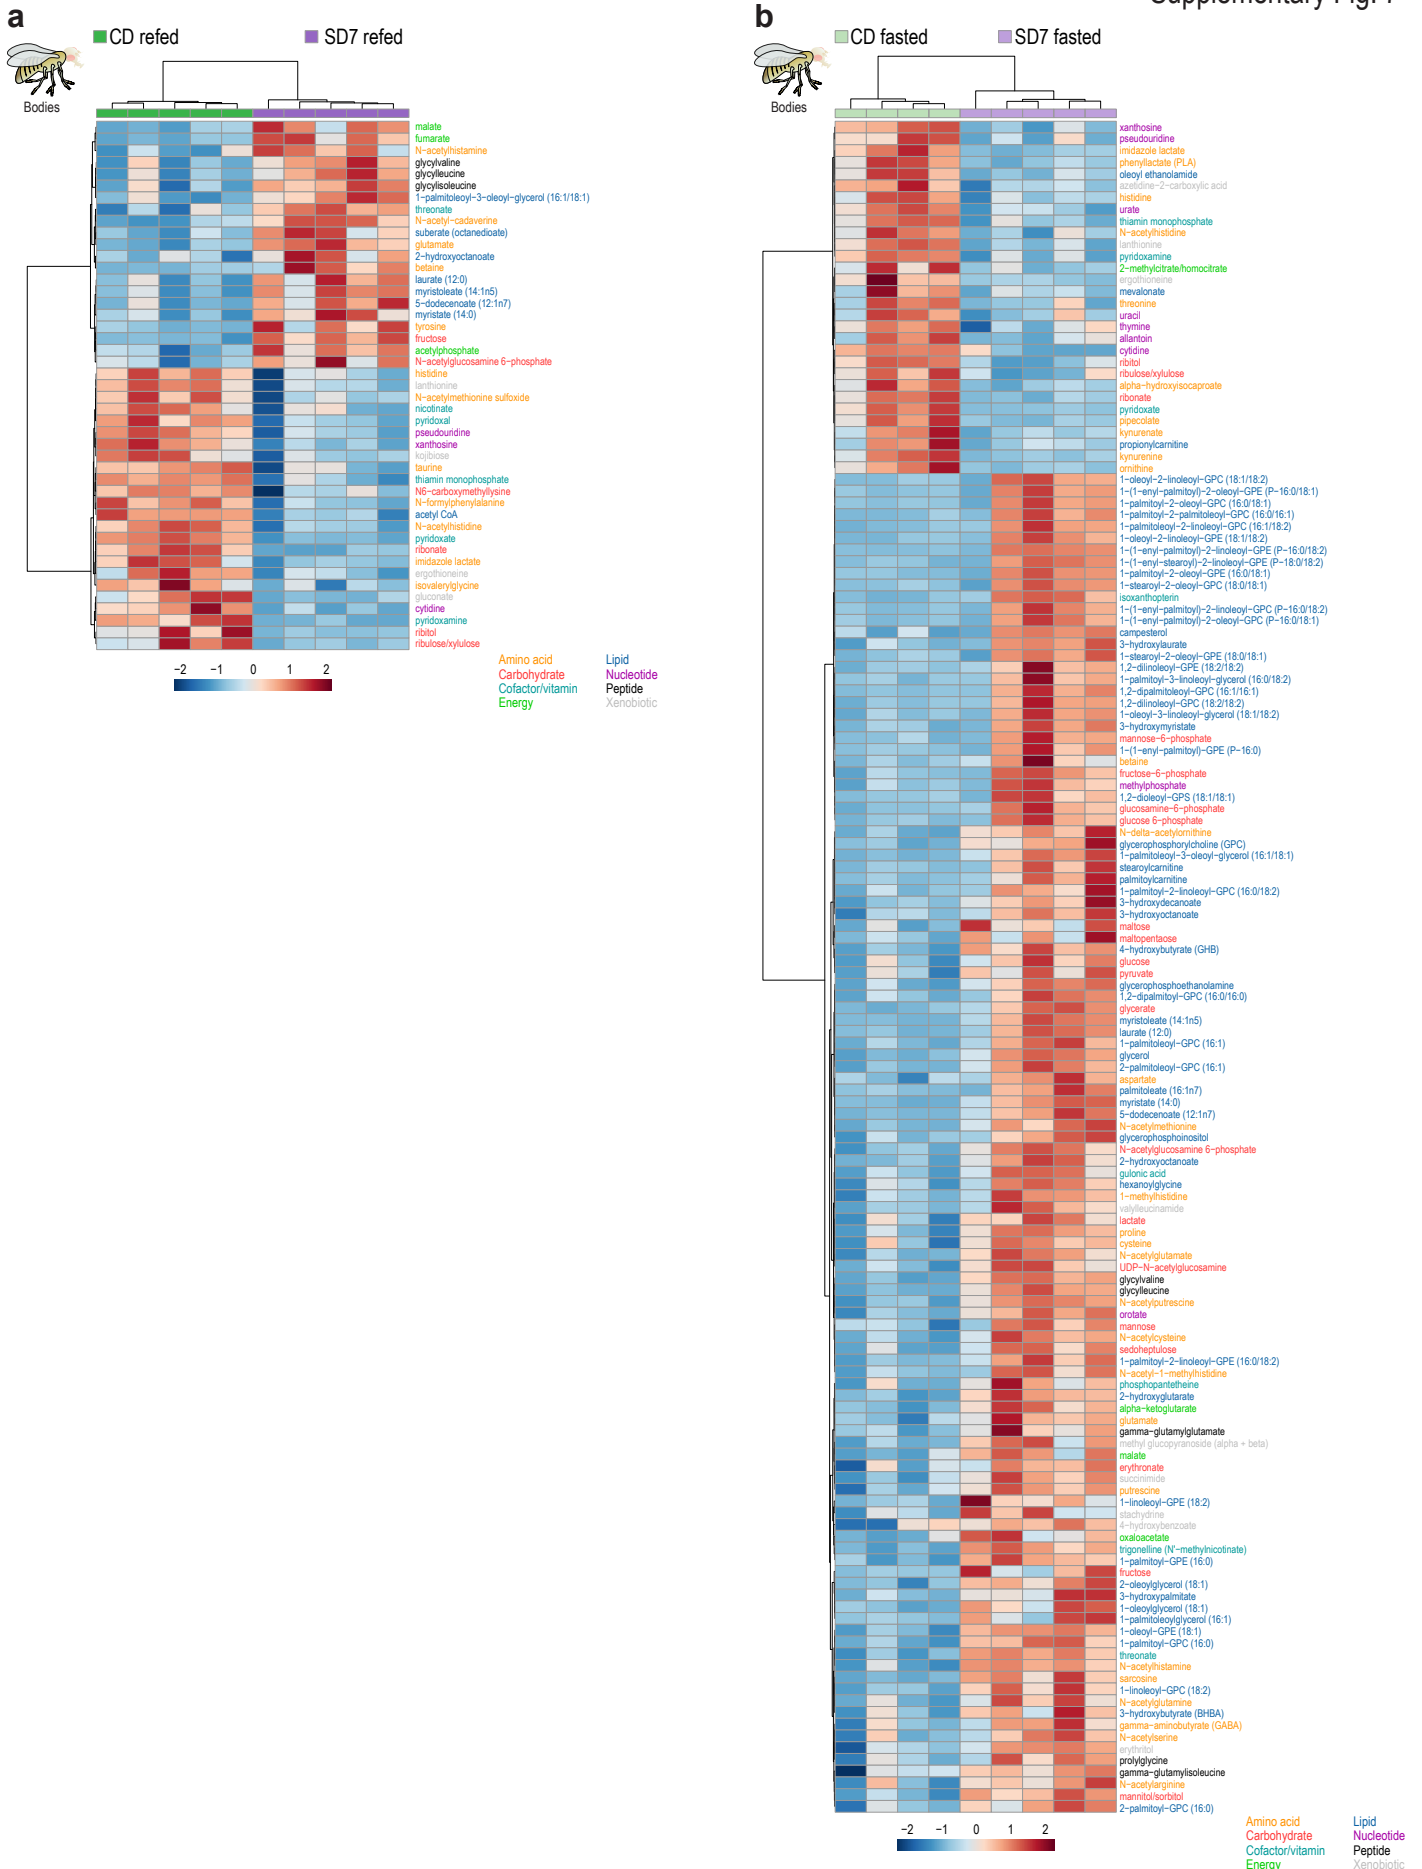

**Supplementary Fig. 7 Comparison of metabolites that change in the bodies of refed and fasted flies fed a control or high sugar diet.**

Heatmap representing the **a)** 45 metabolic compounds that change in the bodies of refed flies between a control diet (CD) and a high sugar diet for 7 days (SD7) and **b)** the 145 metabolic compounds that change in the bodies of fasted flies between a CD and SD7. Welsh test, FDR < 0.1. Normalized compound levels were clustered by compound (rows) and data replicate (columns). Metabolite names are colored according to class (bottom). The heatmap indicates positive (red shades) and negative (blue shades) normalized compound levels. Source data are provided as a Source Data file.

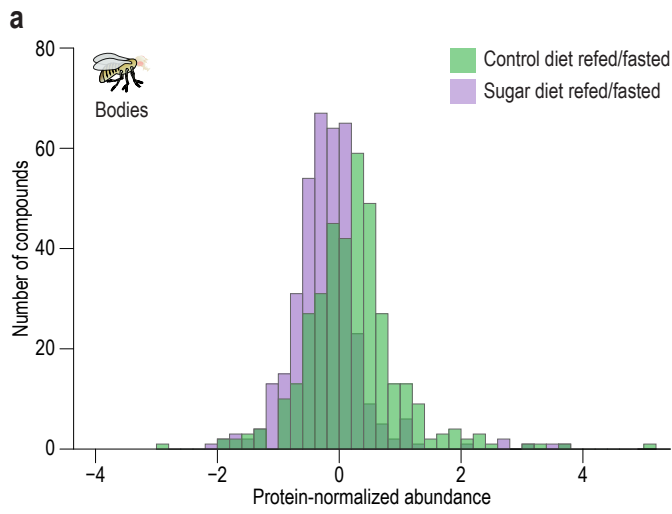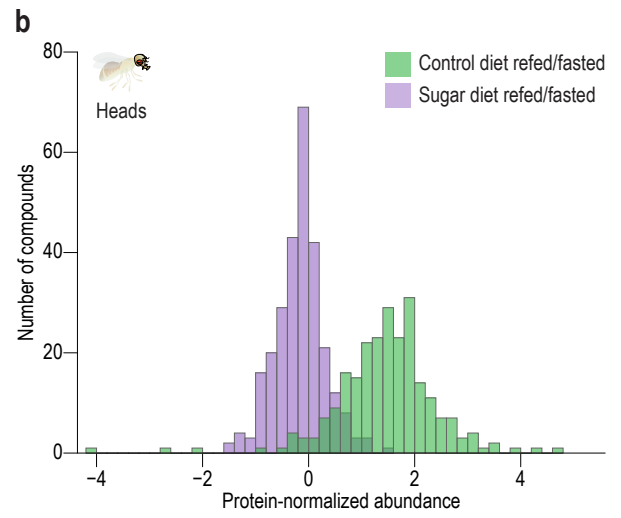

**Supplementary Fig. 8 Distribution of fold changes in metabolites between refed and fasted fly bodies and heads.**

**a, b)** Histogram of compound  $\log_2$  fold changes in protein-normalized abundance between the refed and fasted conditions on control (CD, green) or high sugar diet for 7 days (SD7, purple) for **a)** bodies and **b)** heads. Source data are provided in the Source Data file.



**a**

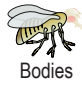

| Sample Name  | Condition    | % Aligned | M Aligned | Length | M Seqs |
|--------------|--------------|-----------|-----------|--------|--------|
| ERR1717103_1 | Sugar diet   | 95        | 17.8      | 75     | 18.7   |
| ERR1717103_2 | Sugar diet   |           |           | 74     | 18.7   |
| ERR1717104_1 | Sugar diet   | 95.5      | 19.2      | 75     | 20.1   |
| ERR1717104_2 | Sugar diet   |           |           | 74     | 20.1   |
| ERR1717105_1 | Sugar diet   | 95.7      | 19.6      | 75     | 20.5   |
| ERR1717105_2 | Sugar diet   |           |           | 74     | 20.5   |
| ERR1717110_1 | Control diet | 95.7      | 21        | 75     | 21.9   |
| ERR1717110_2 | Control diet |           |           | 74     | 21.9   |
| ERR1717111_1 | Control diet | 96.1      | 19.3      | 75     | 20.1   |
| ERR1717111_2 | Control diet |           |           | 74     | 20.1   |
| ERR1717112_1 | Control diet | 96.3      | 20.1      | 75     | 20.8   |
| ERR1717112_2 | Control diet |           |           | 74     | 20.8   |

**b**

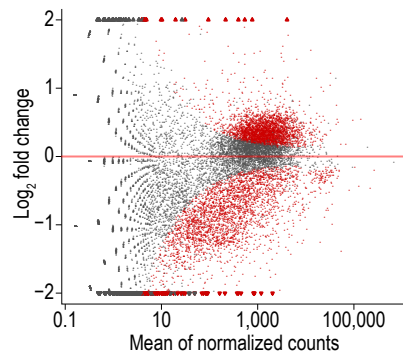

**c**

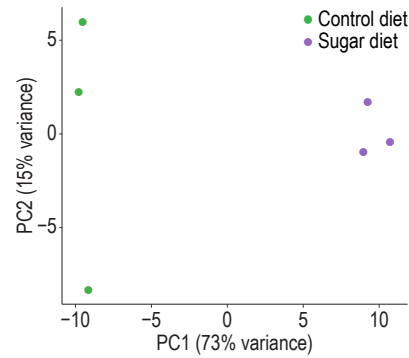

**Supplementary Fig. 9 Summary of RNA-sequencing of fly bodies.**

Reanalysis of RNA sequencing of flies fed a control or sugar from a previously published study<sup>1</sup>.

**a)** Summary of sequencing reads; **b)** MA plot; **c)** Projection onto the two most explanatory principal components of the samples from a). Red circles in MA plot FDR < 0.05 by Wald test. Source data are provided as a Source Data file.

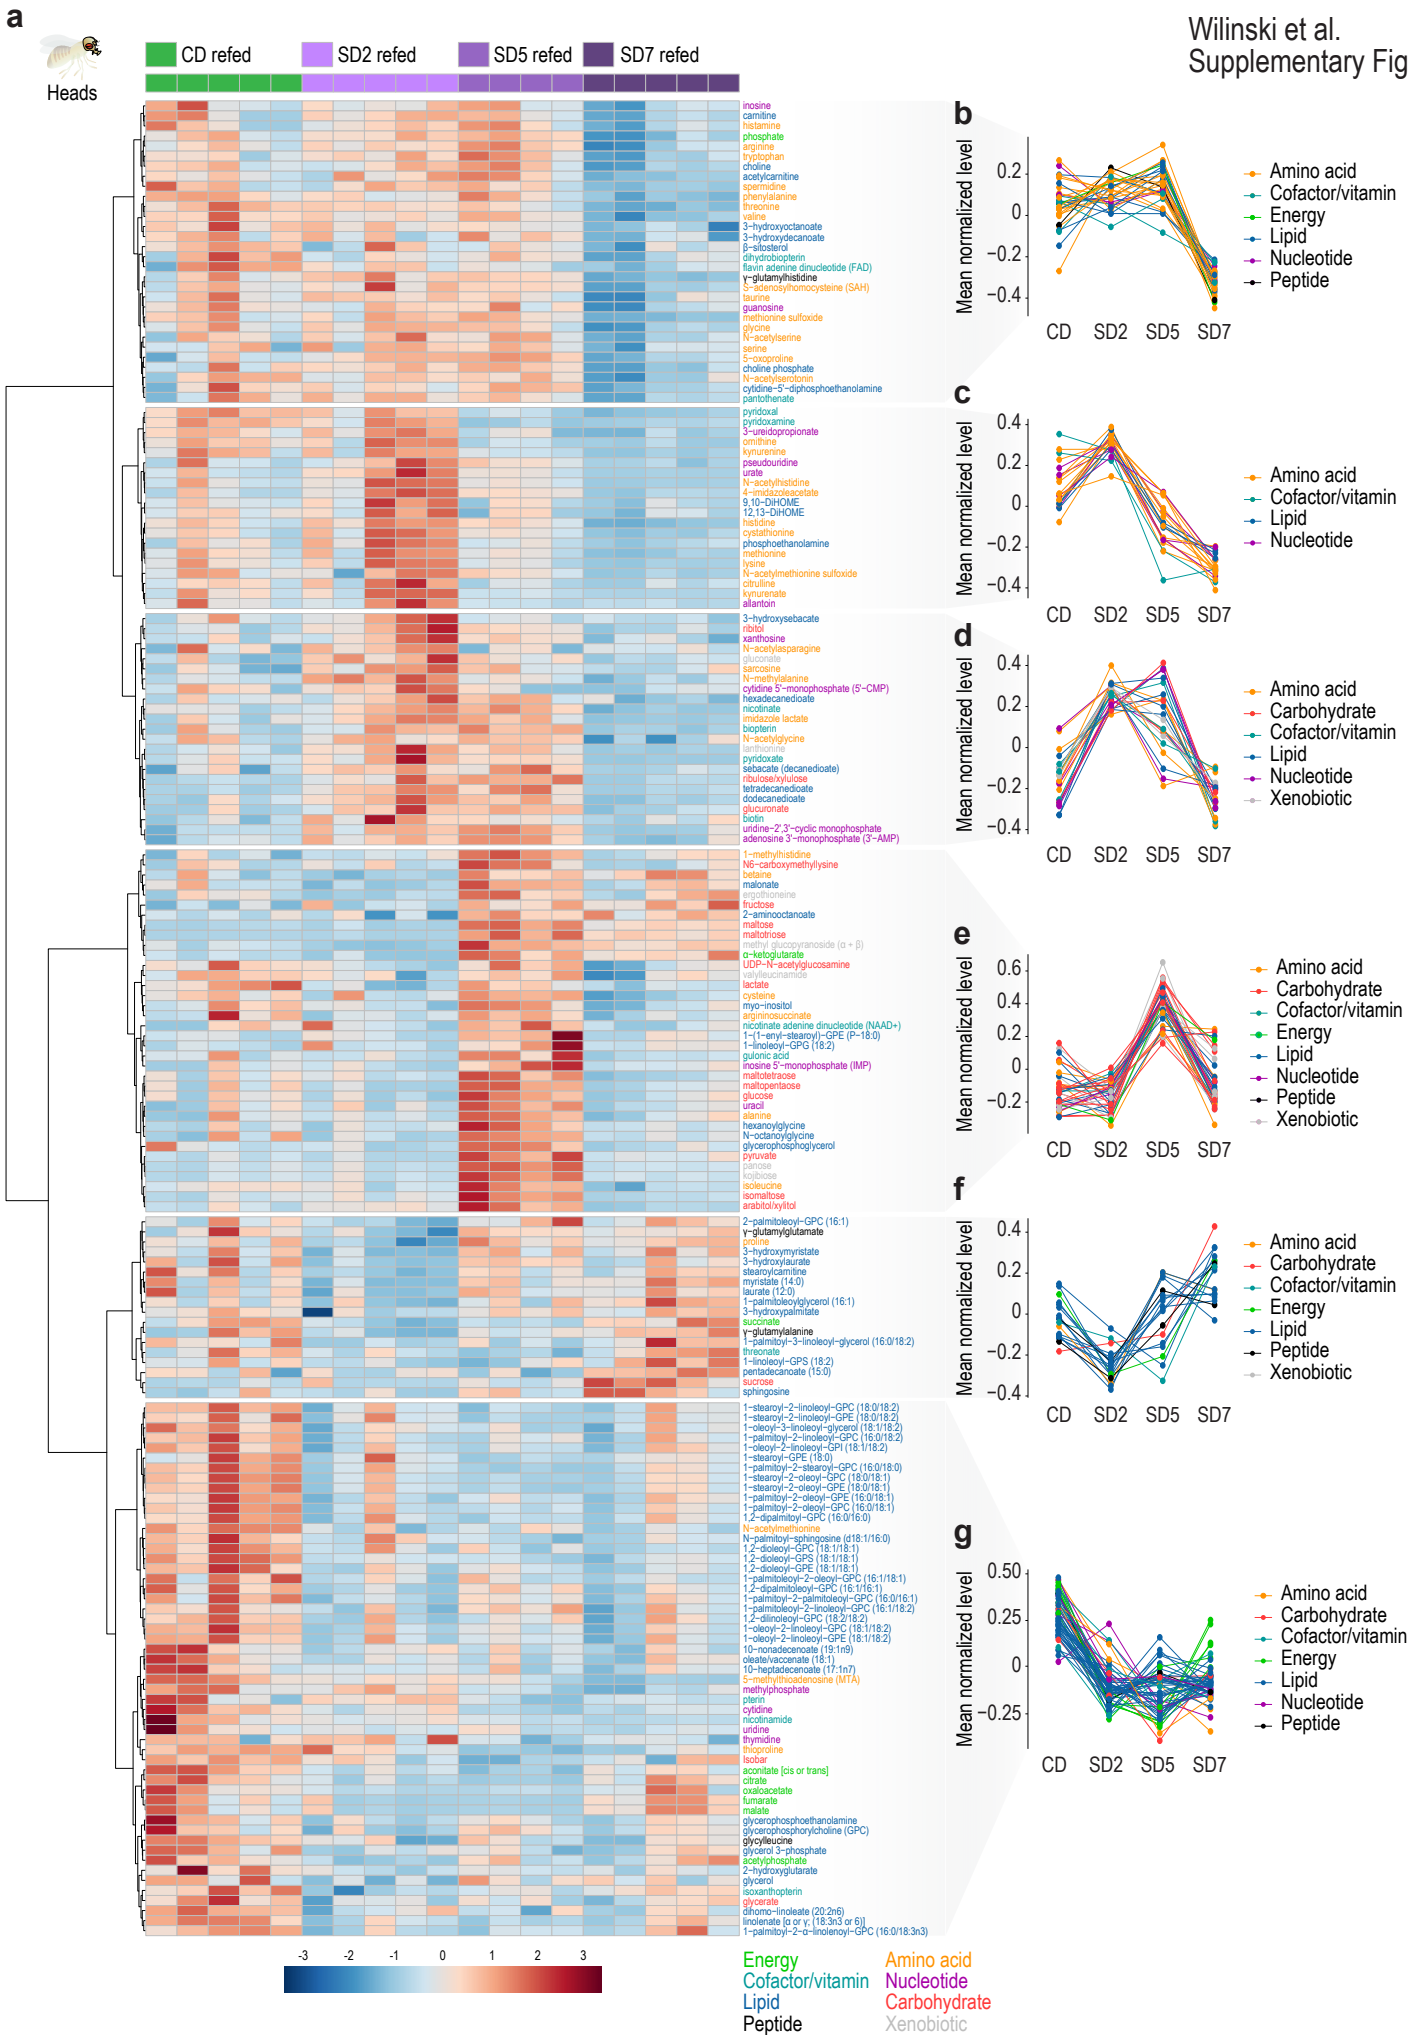

**Supplementary Fig. 10 Comparison of metabolites that change in the heads of sated flies fed a control or high sugar diet for different days.**

**a)** Heatmap representing the 180 metabolic compounds changed in the heads of refed flies on a control diet (CD, green) and high sugar diet for 2, 5, or 7 days (SD2, SD5, SD7, shades of purple); ANOVA, FDR < 0.1. Normalized compound levels were clustered by compound (rows). Metabolite names are colored according to class (bottom).

**b-g)** The mean normalized levels of each compound across each condition (CD, SD2, SD5, and SD7) found in each of the 6 clusters in a). The heatmap indicates positive (red shades) and negative (blue shades) normalized compound levels. Names are colored based on compound class (right). Source data are provided as a Source Data file.

a

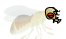

Heads

CD fasted SD2 fasted SD5 fasted SD7 fasted

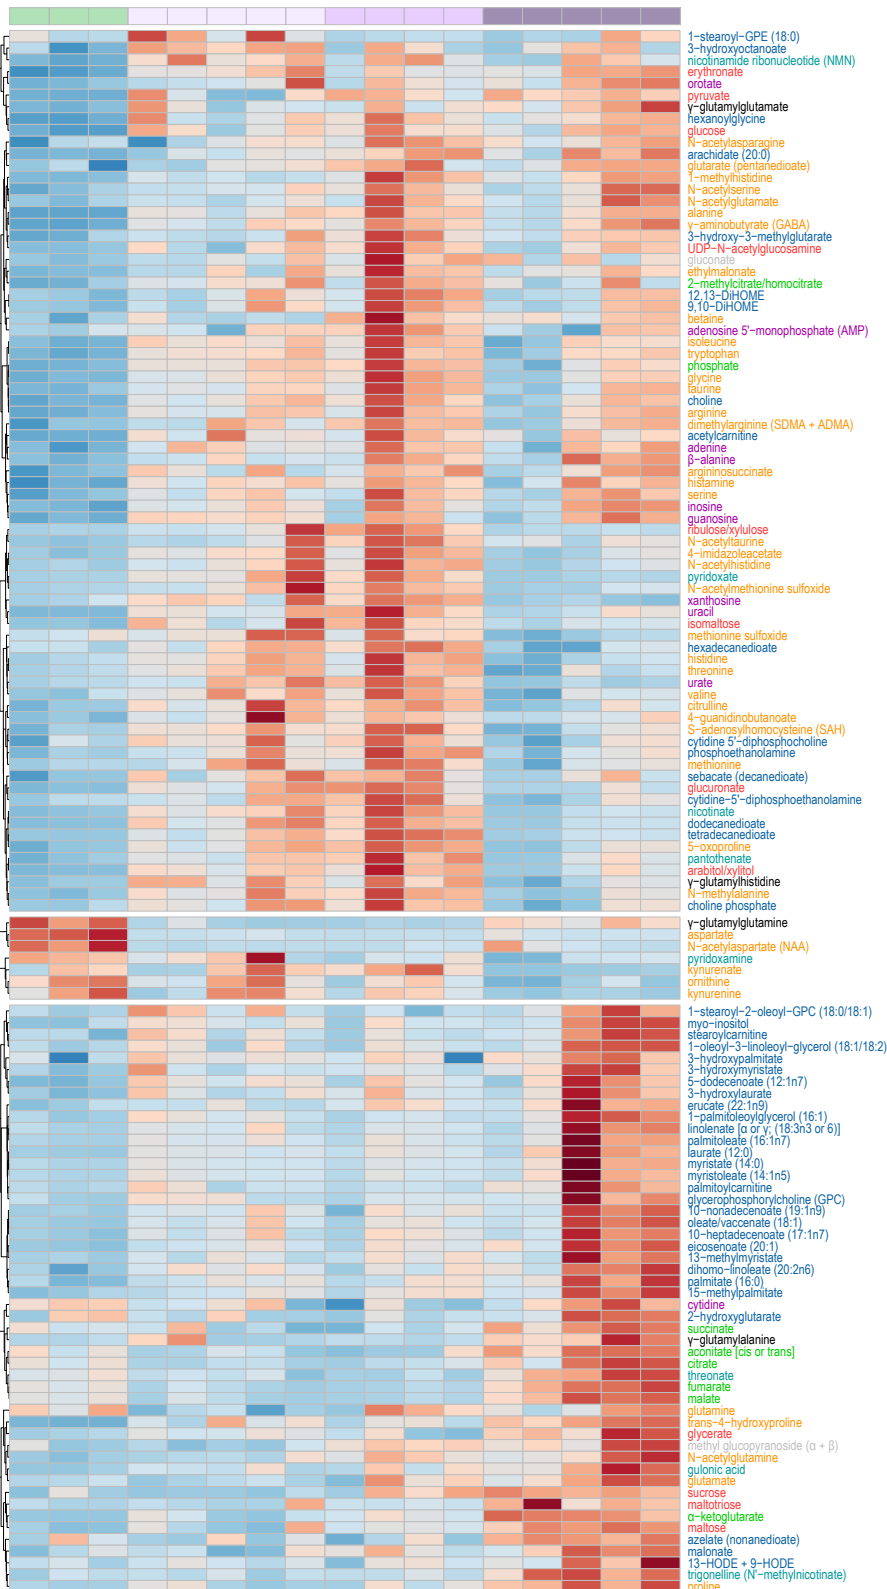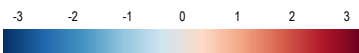

Energy  
Cofactor/vitamin  
Lipid  
Peptide  
Amino acid  
Nucleotide  
Carbohydrate  
Xenobiotic

b

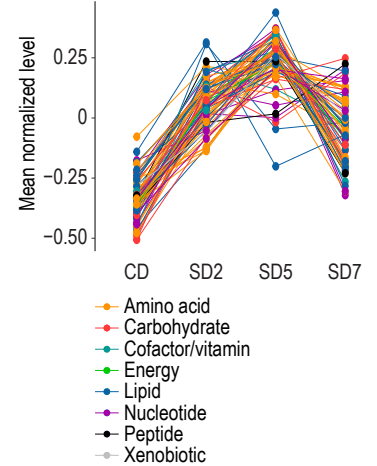

c

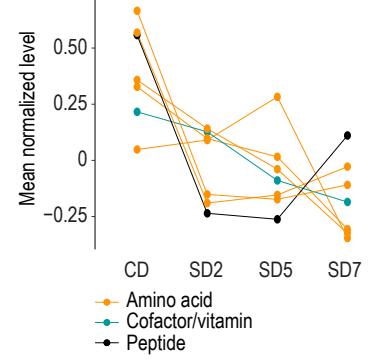

d

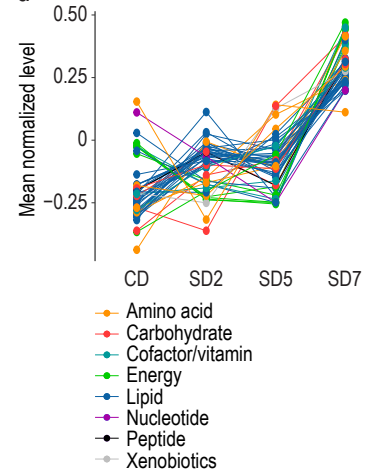

**Supplementary Fig. 11 Comparison of metabolites that change in the heads of fasted flies fed a control or high sugar diet for different days.**

**a)** Heatmap representing the 132 metabolic compounds changed in the heads of fasted flies between a control diet (CD, green) and high sugar diet SD for 2, 5, or 7 days (SD2, SD5, SD7, shades of purple). ANOVA, FDR < 0.1. Normalized compound levels were clustered by compound (rows). Metabolite names are colored according to class (bottom).

**b-d)** The mean normalized levels of each compound across conditions (CD, SD2, SD5, and SD7) found in each of the 3 clusters in (a). The heatmap indicates positive (red shades) and negative (blue shades) normalized compound levels. Names are colored based on compound class (right). Source data are provided as a Source Data file.

## **Supplementary Note 1**

R code used to analyze raw FLIC data.

# FLIC Analysis for Figure 1

R scripts reference site: [https://github.com/PletcherLab/FLIC\\_R\\_Code/tree/master/FLIC](https://github.com/PletcherLab/FLIC_R_Code/tree/master/FLIC)

For more information see: <https://journals.plos.org/plosone/article?id=10.1371/journal.pone.0101107>

## Getting started

Change the working directory to the folder which contains the data and R scripts.

```
knitr::opts_chunk$set(echo = TRUE)
knitr::opts_knit$set(root.dir = "Y:/Wilinski, Daniel/Metabolomics/FLICData/Figure 1")
```

Before getting started a few packages may need to be installed. RStudio will output the error message detailing any missing packages.

## Load source scripts:

```
source("SingleWellChamber.R")

## Loading required package: ggplot2
## Warning: package 'ggplot2' was built under R version 3.5.3

source("TastingDataSum.Well.R")
source("AvgTasteDur.Well.R")
source("CountTastingEvents.Well.R")
source("FeedingAndTasting.Summary.Monitors.R")
source("FeedingAndTasting.Summary.OneWell.R")
source("FeedingAndTasting.Summary.R")
source("GetLatency.R")
source("GetTastingEvents.Well.R")
source("ParametersClass.R")
source("SingleWellChamber.R")
source("TastingDataSum.Well.R")
source("DFM.R")
source("CommonChamber.R")
```

## Set-up parameters for single well experiments

```
p<-ParametersClass.SingleWell()
```

The following parameters need to be set and were determined empirically to represent feeding and tasting.

```
p<-SetParameter(p,Feeding.Threshold.Value=40)
p<-SetParameter(p,Feeding.Interval.Minimum=40)
p<-SetParameter(p,Tasting.Threshold.Interval=c(10,40))
```

## Output summary data

Create the summary file of feeding and tasting data for the DFMs tested. The DFMs are listed within "c()" - these numbers should be exactly as they are output by the MCU. For example, DFM\_1 would be listed below as "1". Specify the start and end time (in minutes) for data analysis within "range=c(0,60)". The start time cannot be modified from "0".



```
FeedingAndTasting.Summary.Monitors(p,c(200, 3, 4, 9, 11, 14, 21, 1900, 4000, 5000, 2700),range=c(0,60))
```

The output file is called “FeedingSummary\_DFM” followed by the numbers of the first and last DFMs listed in the previous line. Using the above as an example, the output file would be called “FeedingSummary\_DFM200\_2700”

# FLIC Analysis for Figure 5

R scripts reference site: [https://github.com/PletcherLab/FLIC\\_R\\_Code/tree/master/FLIC](https://github.com/PletcherLab/FLIC_R_Code/tree/master/FLIC)

For more information see: <https://journals.plos.org/plosone/article?id=10.1371/journal.pone.0101107>

## Getting started

Change the working directory to the folder which contains the data and R scripts.

```
knitr::opts_chunk$set(echo = TRUE)
knitr::opts_knit$set(root.dir = "Y:/Wilinski, Daniel/Metabolomics/FLICData/Figure 5")
```

Before getting started a few packages may need to be installed. RStudio will output the error message detailing any missing packages.

## Load source scripts:

```
source("SingleWellChamber.R")

## Loading required package: ggplot2
## Warning: package 'ggplot2' was built under R version 3.5.3

source("TastingDataSum.Well.R")
source("AvgTasteDur.Well.R")
source("CountTastingEvents.Well.R")
source("FeedingAndTasting.Summary.Monitors.R")
source("FeedingAndTasting.Summary.OneWell.R")
source("FeedingAndTasting.Summary.R")
source("GetLatency.R")
source("GetTastingEvents.Well.R")
source("ParametersClass.R")
source("SingleWellChamber.R")
source("TastingDataSum.Well.R")
source("DFM.R")
source("CommonChamber.R")
```

## Set-up parameters for single well experiments

```
p<-ParametersClass.SingleWell()
```

The following parameters need to be set and were determined empirically to represent feeding and tasting.

```
p<-SetParameter(p,Feeding.Threshold.Value=40)
p<-SetParameter(p,Feeding.Interval.Minimum=40)
p<-SetParameter(p,Tasting.Threshold.Interval=c(10,40))
```

## Output summary data

Create the summary file of feeding and tasting data for the DFMs tested. The DFMs are listed within “c()” - these numbers should be exactly as they are output by the MCU. For example, DFM\_1 would be listed below as “1”. Specify the start and end time (in minutes) for data analysis within “range=c(0,60)”. The start time cannot be modified from “0”.

```
FeedingAndTasting.Summary.Monitors(p,c(1, 2, 3, 4, 5, 6, 7, 8, 9, 11, 12, 13, 14, 15, 16, 17, 18, 19, 20, 21, 22, 23, 24, 25, 26, 27, 28, 29, 30, 31, 32, 33, 34, 35, 36, 37, 38, 39, 40, 41, 42, 43, 44, 45, 46, 47, 48, 49, 50, 51, 52, 53, 54, 55, 56, 57, 58, 59, 60, 61, 62, 63, 64, 65, 66, 67, 68, 69, 70, 71, 72, 73, 74, 75, 76, 77, 78, 79, 80, 81, 82, 83, 84, 85, 86, 87, 88, 89, 90, 91, 92, 93, 94, 95, 96, 97, 98, 99, 100))
```

The output file is called “FeedingSummary\_DFM” followed by the numbers of the first and last DFMs listed in the previous line. Using the above as an example, the output file would be called “FeedingSummary\_DFM1\_400”

## **Supplementary Note 2**

R code used for statistical analysis of metabolomics data.

# Metaboanalyst analysis (pruned pairwise comparisons)

## Import data (Metabolon)

We want to check the raw data to make sure we are on using compounds with only imputed values. So we need to look at the raw data for missing values. We also need the normalized data from the previous analysis

```
library(tidyverse)
```

```
## Warning: package 'tidyverse' was built under R version 3.5.3
```

```
## -- Attaching packages -----
```

```
## v ggplot2 3.1.0      v purrr  0.3.2
## v tibble  2.1.1      v dplyr  0.8.0.1
## v tidyr   0.8.3      v stringr 1.4.0
## v readr   1.3.1      v forcats 0.4.0
```

```
## Warning: package 'ggplot2' was built under R version 3.5.3
```

```
## Warning: package 'tibble' was built under R version 3.5.3
```

```
## Warning: package 'tidyr' was built under R version 3.5.3
```

```
## Warning: package 'readr' was built under R version 3.5.3
```

```
## Warning: package 'purrr' was built under R version 3.5.3
```

```
## Warning: package 'dplyr' was built under R version 3.5.3
```

```
## -- Conflicts -----
```

```
## x dplyr::filter() masks stats::filter()
```

```
## x dplyr::lag()     masks stats::lag()
```

```
library(MetaboAnalystR)
```

```
## Loading required package: lattice
```

```
## Loading required package: pls
```

```
##
```

```
## Attaching package: 'pls'
```

```
## The following object is masked from 'package:stats':
```

```
##
```

```
## loadings
```

```
data <- read.csv("metabolonOriginalData.csv", header = TRUE, row.names = 5)
```

```
# normData <- read.csv('data_normalized_RangeNorm.csv')
```

```
dir.create("analysis")
```

```
dir.create("analysis/dataprocessed")
```

```
dir.create("analysis/normdata")
```

```
dir.create("analysis/ttest")
```

```
dir.create("analysis/foldchange")
```

```
dir.create("analysis/pca")
```

```
dir.create("analysis/heatmap")
```

## Make lists of data columns

Each pairwise comparison using the following data sets.

```
ND_bodies <- c("a7D_ND_sated_bodies_1",
              "a7D_ND_sated_bodies_2",
              "a7D_ND_sated_bodies_3",
              "a7D_ND_sated_bodies_4",
              "a7D_ND_sated_bodies_5",
              "a7D_ND_starved_bodies_6",
              "a7D_ND_starved_bodies_7",
              "a7D_ND_starved_bodies_8",
              "a7D_ND_starved_bodies_9",
              # "a7D_ND_starved_bodies_10"
              5,4)
ND_heads <- c("a7D_ND_sated_heads_6",
             "a7D_ND_sated_heads_7",
             "a7D_ND_sated_heads_8",
             "a7D_ND_sated_heads_9",
             "a7D_ND_sated_heads_10",
             "a7D_ND_starved_heads_1",
             "a7D_ND_starved_heads_2",
             "a7D_ND_starved_heads_3",
             # "a7D_ND_starved_heads_4",
             5,3)
SD7_bodies <- c("a7D_HSD_sated_bodies_21",
               "a7D_HSD_sated_bodies_22",
               "a7D_HSD_sated_bodies_23",
               "a7D_HSD_sated_bodies_24",
               "a7D_HSD_sated_bodies_25",
               "a7D_HSD_starved_bodies_26",
               "a7D_HSD_starved_bodies_27",
               "a7D_HSD_starved_bodies_28",
               "a7D_HSD_starved_bodies_29",
               "a7D_HSD_starved_bodies_30",
               5,5)
SD2_heads <- c("a2D_HSD_sated_heads_41",
              "a2D_HSD_sated_heads_42",
              "a2D_HSD_sated_heads_43",
              "a2D_HSD_sated_heads_44",
              "a2D_HSD_sated_heads_45",
              "a2D_HSD_starved_heads_46",
              "a2D_HSD_starved_heads_47",
              "a2D_HSD_starved_heads_48",
              "a2D_HSD_starved_heads_49",
              "a2D_HSD_starved_heads_50",
              5,5)
SD5_heads <- c("#a5D_HSD_sated_heads_31",
              "a5D_HSD_sated_heads_32",
              "a5D_HSD_sated_heads_33",
              "a5D_HSD_sated_heads_34",
              "a5D_HSD_sated_heads_35",
              "a5D_HSD_starved_heads_36",
              "a5D_HSD_starved_heads_37",
              "a5D_HSD_starved_heads_38",
```

```

      "a5D_HSD_starved_heads_39",
      #"a5D_HSD_starved_heads_40",
      4,4)
SD7_heads <- c("a7D_HSD_sated_heads_11",
              "a7D_HSD_sated_heads_12",
              "a7D_HSD_sated_heads_13",
              "a7D_HSD_sated_heads_14",
              "a7D_HSD_sated_heads_15",
              "a7D_HSD_starved_heads_16",
              "a7D_HSD_starved_heads_17",
              "a7D_HSD_starved_heads_18",
              "a7D_HSD_starved_heads_19",
              "a7D_HSD_starved_heads_20",
              5,5)
NDvSD_sated_bodies <- c("a7D_ND_sated_bodies_1",
                       "a7D_ND_sated_bodies_2",
                       "a7D_ND_sated_bodies_3",
                       "a7D_ND_sated_bodies_4",
                       "a7D_ND_sated_bodies_5",
                       "a7D_HSD_sated_bodies_21",
                       "a7D_HSD_sated_bodies_22",
                       "a7D_HSD_sated_bodies_23",
                       "a7D_HSD_sated_bodies_24",
                       "a7D_HSD_sated_bodies_25",
                       5,5)
NDvSD_starved_bodies <- c("a7D_ND_starved_bodies_6",
                         "a7D_ND_starved_bodies_7",
                         "a7D_ND_starved_bodies_8",
                         "a7D_ND_starved_bodies_9",
                         "a7D_HSD_starved_bodies_26",
                         "a7D_HSD_starved_bodies_27",
                         "a7D_HSD_starved_bodies_28",
                         "a7D_HSD_starved_bodies_29",
                         "a7D_HSD_starved_bodies_30",
                         4,5)

```

## Pariwise analysis

### Subset the data into chunks that for pariwise comparison

Remove the comounds (rows) that did were not measure in the original data.

```

listofvectors <- list(ND_bodies, ND_heads, SD7_bodies, SD2_heads, SD5_heads,
                     SD7_heads, NDvSD_sated_bodies, NDvSD_starved_bodies)
# getwd()

```

This creates a list of vectors (c(something) concatenates the vectors into one so you get each individual element as one)

```

for(dataname in listofvectors) {
  #data_subset <- data %>%
  # select (dataname)

## preprocessing step
  data_subset <- data %>%

```

```

# select(dataname) %>%
select(dataname[1:(length(dataname)-2)]) %>% ## take only a subset of the data
rownames_to_column("COMP_ID") %>% ## make row names a column
#slice(2:n()) ## remove top line
row.vector1 <- (as.numeric())
row.vector2 <- (as.numeric())
for (row in 1:nrow(data.subset)) {
  temp <- data.subset[row,]
  # split temp into two vectors based on number of replicates
  temp1 <- temp[2:((as.numeric(dataname[(length(dataname)-1)]))+1)]
  temp2 <- temp[((as.numeric(dataname[(length(dataname)-1)]))+2):((as.numeric(dataname[length(dataname)])))]

  #print (rowSums(is.na(temp)))
  row.vector1 <- c(row.vector1, rowSums(is.na(temp1)))
  row.vector2 <- c(row.vector2, rowSums(is.na(temp2)))
}
data.subset.na <- cbind(row.vector1, row.vector2, data.subset)

## define the number of NAs allowed in each data set
rm(cutoff.nas)

dim.data1 <- (as.numeric(dataname[(length(dataname)-1)]))
dim.data2 <- (as.numeric(dataname[(length(dataname))]))
## first set
if(dim.data1 == 3) {
  cutoff.nas1 <- 2
}
if(dim.data1 == 4) {
  cutoff.nas1 <- 3
}
if(dim.data1 == 5) {
  cutoff.nas1 <- 3
}
## second set
if(dim.data2 == 3) {
  cutoff.nas2 <- 2
}
if(dim.data2 == 4) {
  cutoff.nas2 <- 3
}
if(dim.data2 == 5) {
  cutoff.nas2 <- 3
}

# remove rows that exceed the number of NAs
data.subset.na.cutoff <- dplyr::filter(data.subset.na, row.vector1 < cutoff.nas1)
data.subset.na.cutoff <- dplyr::filter(data.subset.na.cutoff, row.vector2 < cutoff.nas2)

# remove row.vector column
data.subset.na.cutoff.n <- dplyr::select(data.subset.na.cutoff, -row.vector1, -row.vector2)

## end preprocessing

```



```

write.csv(data.subset.na.cutoff.n,file="tmp_data_subset.csv",row.names = FALSE)

rm (mSet) ## clear data
mSet<-InitDataObjects("conc", "stat", FALSE)
#par(family="sans")
mSet<-Read.TextData(mSet, "tmp_data_subset.csv", "colu", "disc");
mSet<-SanityCheckData(mSet)
mSet$dataSet$check.msg

mSet<-RemoveMissingPercent(mSet, percent=0.5) ## remove compounds that have too many missing values
mSet<-ImputeVar(mSet, method="min")
mSet$dataSet$check.msg

mSet<-Normalization(mSet, "NULL", "NULL", "RangeNorm", ratio=FALSE, ratioNum=20)

mSet<-PlotNormSummary(mSet, paste("plots/norm_2_",sep=''), "png", 300, width=NA)
mSet<-PlotSampleNormSummary(mSet, paste("plots/snorm_2_",sep=''), "png", 300, width=NA)

mSet<-SaveTransformedData(mSet)

file.rename ("data_processed.csv",paste("analysis/dataprocessed/data_processed",dataname[1],dataname[length(dataname)]))
file.rename ("data_normalized.csv",paste("analysis/normdata/data_normalized_RangeNorm_",dataname[1],dataname[length(dataname)]))

## T-tests
mSet<-Ttests.Anal(mSet, F, 1, FALSE, TRUE) ## I do this so that I get all the values not just significant
file.rename("t_test.csv",paste("analysis/ttest/t_test_",dataname[1],dataname[length(dataname)-2],".csv"))

## Fold change
mSet<-FC.Anal.unpaired(mSet, fc.thresh= 1.0, cmp.type = 0)
mSet<-SaveTransformedData(mSet)
file.rename("fold_change.csv",paste("analysis/foldchange/fold_change_",dataname[1],dataname[length(dataname)]))
#file.remove("data_original.csv")

## PCA analysis
mSet<-PCA.Anal(mSet)
mSet<-PlotPCA2DScore(mSet, paste ("analysis/pca/pca_score2d_",dataname[1],dataname[length(dataname)]))
# mSet<-PlotPCA2DScore(mSet, paste ("analysis/pca/pca_score2d_",dataname[1],dataname[length(dataname)]))
file.rename("pca_loadings.csv",paste("analysis/pca/pca_loadings_",dataname[1],dataname[length(dataname)]))
file.rename("pca_score.csv", paste("analysis/pca/pca_score_",dataname[1],dataname[length(dataname)]))

## remove temp files
file.remove("tmp_data_subset_remove_percent.csv")
file.remove("data_original.csv")
file.remove("tmp_data_subset.csv")

#####
##### heatmaps2
#####

## count number of sig compounds
fdr.p <- p.adjust(mSet$analSet$tt$p.value, "fdr")
fdr.p <- as.data.frame(fdr.p)

```

```

numb.fdr.p<-NROW(dplyr::filter(fdr.p,fdr.p < 0.1))
#numb.fdr.p <- 75 ## or make static number
print ("Number of significant compounds FDR 0.1 :")
print (numb.fdr.p)

if(numb.fdr.p > 0) {
  var.nms <- names(sort(mSet$analSet$tt$p.value))[1:numb.fdr.p] ## reports the x significant compounds
  var.inx <- match(var.nms, colnames(mSet$dataSet$norm))
  my.data <- mSet$dataSet$norm
  hc.dat <- as.matrix(my.data[, var.inx])

  colors <- rev(colorRampPalette(RColorBrewer::brewer.pal(10, "RdBu"))(256))

  clusters<-pheatmap::pheatmap(t(hc.dat),
                               fontsize = 5,clustering_distance_rows = "euclidean",
                               clustering_distance_cols = "euclidean", clustering_method = "ward.D",
                               border_color = "grey", cluster_rows = T, cluster_cols = T, scale = "row",
                               cellheight = 4.402, cellwidth = 11.709, annotation_colors = TRUE, color = "red",
                               filename = paste("analysis/heatmap/heatmapSigONLY_",dataname[1],dataname
                               main = paste(dataname[1],dataname[length(dataname)-2],sep='\n'))
#####

  colortable <- read.table("H:/DusLab/data/Metabolimics/Data/Data3/colorCompoundNames/colorClassKey.txt")
  NameIDClasstable <- read.table("H:/DusLab/data/Metabolimics/Data/Data3/colorCompoundNames/compoundsName.txt")

  namesforheatmap <- clusters$tree_row$labels[clusters$tree_row$order] ## puts IDs in order
  namesforheatmap <- as.data.frame(namesforheatmap) ## convert to data frame
  names (namesforheatmap) <- "COMP_ID" ## add a header name

  namesforheatmap <- dplyr::inner_join(namesforheatmap,NameIDClasstable, by="COMP_ID") ## only the comp_
  namesforheatmap <- dplyr::inner_join(namesforheatmap,colortable, by = "SUPER_PATHWAY") ## add color in

  x <- namesforheatmap$BIOCHEMICAL ## take only BIOCHEMICAL (biochemical names)
  y <- c(1:numb.fdr.p) ## dummy data

  a <- namesforheatmap$color

  plot_data <- data.frame(x, y)

  #plot_data$y <- as.numeric(as.character(plot_data$y))
  #plot_data <- t(plot_data)
  plot_data <-plot_data[dim(plot_data)[1]:1,] ## flip order
  a <-rev(a) ## flip order
  p <- ggplot(plot_data, aes(x = y, y = x)) +
    #geom_bar(stat = "identity") +
    geom_point() +
    scale_y_discrete(limits=plot_data$x) + ## this prevents re-sorting
    theme(axis.text.y = element_text(angle = 0, hjust = 1, color = a, size = 4)) +
    ggtitle(paste(dataname[1],dataname[length(dataname)-2],sep='\n')) +
    xlab("toy data") +
    ylab("Names")

  ggsave(paste("analysis/heatmap/heatmapNamesColored_",dataname[1],dataname[length(dataname)-2], ".pdf",sep=

```

```
}  
}
```

```
## [1] "R objects intialized ..."  
## [1] "A total of 369 significant features were found."  
## [1] "Number of signifcant compounds FDR 0.1 :"  
## [1] 61  
## [1] "R objects intialized ..."  
## [1] "A total of 242 significant features were found."  
## [1] "Number of signifcant compounds FDR 0.1 :"  
## [1] 159  
## [1] "R objects intialized ..."  
## [1] "A total of 373 significant features were found."  
## [1] "Number of signifcant compounds FDR 0.1 :"  
## [1] 14  
## [1] "R objects intialized ..."  
## [1] "A total of 271 significant features were found."  
## [1] "Number of signifcant compounds FDR 0.1 :"  
## [1] 10  
## [1] "R objects intialized ..."  
## [1] "A total of 280 significant features were found."  
## [1] "Number of signifcant compounds FDR 0.1 :"  
## [1] 43  
## [1] "R objects intialized ..."  
## [1] "A total of 276 significant features were found."  
## [1] "Number of signifcant compounds FDR 0.1 :"  
## [1] 0  
## [1] "R objects intialized ..."  
## [1] "A total of 363 significant features were found."  
## [1] "Number of signifcant compounds FDR 0.1 :"  
## [1] 45  
## [1] "R objects intialized ..."  
## [1] "A total of 374 significant features were found."  
## [1] "Number of signifcant compounds FDR 0.1 :"  
## [1] 144
```

# Metaboanalyst analysis (pruned Anova Sated and Starved comparisions)

## Import data (Metabolon)

We want to check the raw data to make sure we are on using comopunds with only imputed values. So we need to look at the raw data for missing values. We also need the normalized data from the previous analysis

```
library(tidyverse)
```

```
## Warning: package 'tidyverse' was built under R version 3.5.3
```

```
## -- Attaching packages -----
```

```
## v ggplot2 3.1.0      v purrr  0.3.2
## v tibble  2.1.1      v dplyr  0.8.0.1
## v tidyr   0.8.3      v stringr 1.4.0
## v readr   1.3.1      v forcats 0.4.0
```

```
## Warning: package 'ggplot2' was built under R version 3.5.3
```

```
## Warning: package 'tibble' was built under R version 3.5.3
```

```
## Warning: package 'tidyr' was built under R version 3.5.3
```

```
## Warning: package 'readr' was built under R version 3.5.3
```

```
## Warning: package 'purrr' was built under R version 3.5.3
```

```
## Warning: package 'dplyr' was built under R version 3.5.3
```

```
## -- Conflicts -----
```

```
## x dplyr::filter() masks stats::filter()
```

```
## x dplyr::lag()     masks stats::lag()
```

```
library(MetaboAnalystR)
```

```
## Loading required package: lattice
```

```
## Loading required package: pls
```

```
##
```

```
## Attaching package: 'pls'
```

```
## The following object is masked from 'package:stats':
```

```
##
```

```
## loadings
```

```
data <- read.csv("metabolonOriginalData.csv", header = TRUE, row.names = 5)
```

```
# normData <- read.csv('data_normalized_RangeNorm.csv')
```

```
dir.create("analysisANOVA")
```

```
## Warning in dir.create("analysisANOVA"): 'analysisANOVA' already exists
```

```
dir.create("analysisANOVA/dataprocessed")
```

```

## Warning in dir.create("analysisANOVA/dataprocessed"):
## 'analysisANOVA\dataprocessed' already exists
dir.create("analysisANOVA/normdata")

## Warning in dir.create("analysisANOVA/normdata"): 'analysisANOVA\normdata'
## already exists
dir.create("analysisANOVA/anova")

## Warning in dir.create("analysisANOVA/anova"): 'analysisANOVA\anova' already
## exists
dir.create("analysisANOVA/foldchange")

## Warning in dir.create("analysisANOVA/foldchange"):
## 'analysisANOVA\foldchange' already exists
dir.create("analysisANOVA/pca")

## Warning in dir.create("analysisANOVA/pca"): 'analysisANOVA\pca' already
## exists
dir.create("analysisANOVA/heatmap")

## Warning in dir.create("analysisANOVA/heatmap"): 'analysisANOVA\heatmap'
## already exists

```

## Make lists of data columns

Each comparison using the following data sets.

```

sated_heads <- c(
  "a7D_ND_sated_heads_6",
    "a7D_ND_sated_heads_7",
    "a7D_ND_sated_heads_8",
    "a7D_ND_sated_heads_9",
    "a7D_ND_sated_heads_10",
  "a2D_HSD_sated_heads_41",
    "a2D_HSD_sated_heads_42",
    "a2D_HSD_sated_heads_43",
    "a2D_HSD_sated_heads_44",
    "a2D_HSD_sated_heads_45",
  "a5D_HSD_sated_heads_32",
    "a5D_HSD_sated_heads_33",
    "a5D_HSD_sated_heads_34",
    "a5D_HSD_sated_heads_35",
  "a7D_HSD_sated_heads_11",
    "a7D_HSD_sated_heads_12",
    "a7D_HSD_sated_heads_13",
    "a7D_HSD_sated_heads_14",
    "a7D_HSD_sated_heads_15"
)

starved_heads <- c(
  "a7D_ND_starved_heads_1",
    "a7D_ND_starved_heads_2",
    "a7D_ND_starved_heads_3",

```

```

"a2D_HSD_starved_heads_46",
  "a2D_HSD_starved_heads_47",
  "a2D_HSD_starved_heads_48",
  "a2D_HSD_starved_heads_49",
  "a2D_HSD_starved_heads_50",
"a5D_HSD_starved_heads_36",
  "a5D_HSD_starved_heads_37",
  "a5D_HSD_starved_heads_38",
  "a5D_HSD_starved_heads_39",
  # "a5D_HSD_starved_heads_40",
"a7D_HSD_starved_heads_16",
  "a7D_HSD_starved_heads_17",
  "a7D_HSD_starved_heads_18",
  "a7D_HSD_starved_heads_19",
  "a7D_HSD_starved_heads_20"
)

```

## Analysis

### Subset the data into chunks for comparison

```
listofvectors <- list(sated_heads, starved_heads)
```

This creates a list of vectors (c(something) concatenates the vectors into one so you get each individual element as one)

```

for(dataname in listofvectors) {
  data_subset <- data %>%
    select (dataname)
  write.csv(data_subset, file="tmp_data_subset.csv")

  rm (mSet) ## clear data
  mSet<-InitDataObjects("conc", "stat", FALSE)
  #par(family="sans")
  mSet<-Read.TextData(mSet, "tmp_data_subset.csv", "colu", "disc");
  mSet<-SanityCheckData(mSet)
  mSet$dataSet$check.msg

  mSet<-RemoveMissingPercent(mSet, percent=0.5) ## remove compounds that have too many missing values
  mSet<-ImputeVar(mSet, method="min")
  mSet$dataSet$check.msg

  mSet<-Normalization(mSet, "NULL", "NULL", "RangeNorm", ratio=FALSE, ratioNum=20)

  mSet<-PlotNormSummary(mSet, paste("plots/norm_2_", sep=''), "png", 300, width=NA)
  mSet<-PlotSampleNormSummary(mSet, paste("plots/snorm_2_", sep=''), "png", 300, width=NA)

  mSet<-SaveTransformedData(mSet)

  file.rename ("data_processed.csv", paste("analysisANOVA/dataprocessed/data_processed", dataname[1], dataname))
  file.rename ("data_normalized.csv", paste("analysisANOVA/normdata/data_normalized_RangeNorm_", dataname[1], dataname))

  ## T-tests
  #mSet<-Ttests.Anal(mSet, F, 1, FALSE, TRUE) ## I do this so that I get all the values not just signif

```

```

#file.rename("t_test.csv",paste("analysisANOVA/ttest/t_test_",dataname[1],dataname[length(dataname)]),

## ANOVA
mSet<-ANOVA.Anal(mSet, F, 1.0, "fisher")
file.rename("anova_posthoc.csv",paste("analysisANOVA/anova/anova_",dataname[1],dataname[length(dataname)]),

## Fold change
mSet<-FC.Anal.unpaired(mSet, fc.thresh= 1.0, cmp.type = 0)
mSet<-SaveTransformedData(mSet)
file.rename("fold_change.csv",paste("analysisANOVA/foldchange/fold_change_",dataname[1],dataname[length(dataname)]),
file.remove("data_original.csv")

## PCA analysis
mSet<-PCA.Anal(mSet)
mSet<-PlotPCA2DScore(mSet, paste ("analysisANOVA/pca/pca_score2d_",dataname[1],dataname[length(dataname)]),
# mSet<-PlotPCA2DScore(mSet, paste ("analysisANOVA/pca/pca_score2d_",dataname[1],dataname[length(dataname)]),
file.rename("pca_loadings.csv",paste("analysisANOVA/pca/pca_loadings_",dataname[1],dataname[length(dataname)]),
file.rename("pca_score.csv", paste("analysisANOVA/pca/pca_score_",dataname[1],dataname[length(dataname)]),

## remove temp files
file.remove("tmp_data_subset_remove_percent.csv")
file.remove("data_original.csv")
file.remove("tmp_data_subset.csv")

#####
##### heatmaps2
#####

## count number of sig compounds
fdr.p <- p.adjust(mSet$analSet$aov$p.value, "fdr")
fdr.p <- as.data.frame(fdr.p)
numb.fdr.p<-NROW(dplyr::filter(fdr.p,fdr.p < 0.1))
#numb.fdr.p <- 75 ## or make static number
print ("Number of significant compounds FDR 0.1 :")
print (numb.fdr.p)

if(numb.fdr.p > 0) {
  var.nms <- names(sort(mSet$analSet$aov$p.value))[1:numb.fdr.p] ## reports the x significant compounds
  var.inx <- match(var.nms, colnames(mSet$dataSet$norm))
  my.data <- mSet$dataSet$norm
  hc.dat <- as.matrix(my.data[, var.inx])

  colors <- rev(colorRampPalette(RColorBrewer::brewer.pal(10, "RdBu"))(256))

  clusters<-pheatmap::pheatmap(t(hc.dat),
    fontsize = 5,clustering_distance_rows = "euclidean",
    clustering_distance_cols = "euclidean", clustering_method = "ward.D",
    border_color = "grey", cluster_rows = T, cluster_cols = T, scale = "row",
    cellheight = 4.402, cellwidth = 11.709, annotation_colors = TRUE, color = colors,
    filename = paste("analysisANOVA/heatmap/heatmapSigONLY_",dataname[1],dataname[length(dataname)]),

```

```

        main = paste(dataname[1],dataname[length(dataname)],sep='\n'))
#####

#####

colortable <- read.table("H:/DusLab/data/Metabolimics/Data/Data3/colorCompoundNames/colorClassKey.txt")
NameIDClasstable <- read.table("H:/DusLab/data/Metabolimics/Data/Data3/colorCompoundNames/compoundsNames.txt")

namesforheatmap <- clusters$tree_row$labels[clusters$tree_row$order] ## puts IDs in order
namesforheatmap <- as.data.frame(namesforheatmap) ## convert to data frame
names(namesforheatmap) <- "COMP_ID" ## add a header name

namesforheatmap <- dplyr::inner_join(namesforheatmap,NameIDClasstable, by="COMP_ID") ## only the compounds
namesforheatmap <- dplyr::inner_join(namesforheatmap,colortable, by = "SUPER_PATHWAY") ## add color

x <- namesforheatmap$BIOCHEMICAL ## take only BIOCHEMICAL (biochemical names)
y <- c(1:numb.fdr.p) ## dummy data

a <- namesforheatmap$color

plot_data <- data.frame(x, y)

#plot_data$y <- as.numeric(as.character(plot_data$y))
#plot_data <- t(plot_data)
plot_data <-plot_data[dim(plot_data)[1]:1,] ## flip order
a <-rev(a) ## flip order
p <- ggplot(plot_data, aes(x = y, y = x)) +
  #geom_bar(stat = "identity") +
  geom_point() +
  scale_y_discrete(limits=plot_data$x) + ## this prevents re-sorting
  theme(axis.text.y = element_text(angle = 0, hjust = 1, color = a, size = 4)) +
  ggtitle(paste(dataname[1],dataname[length(dataname)],sep='\n')) +
  xlab("toy data") +
  ylab("Names")

ggsave(paste("analysisANOVA/heatmap/heatmapNamesColored_",dataname[1],dataname[length(dataname)]),".pdf")
}
}

## [1] "R objects intialized ..."
## [1] "A total of 296 significant features were found."
## [1] "Number of significant compounds FDR 0.1 :"
## [1] 194
## [1] "R objects intialized ..."
## [1] "A total of 276 significant features were found."
## [1] "Number of significant compounds FDR 0.1 :"
## [1] 161

```



```
orderedbycluster <- rownames(t(hc.dat)[clusters$tree_row[["order"]],])  
## add data
```

```
orderedbycluster <- as.data.frame.integer(orderedbycluster)  
colnames(orderedbycluster) <- "ID"  
head(orderedbycluster)
```

```
##      ID  
## 1 1898  
## 2 34398  
## 3 1437  
## 4 37063  
## 5 1124  
## 6 34409
```

```
hc.dat <- (t(hc.dat))  
hc.dat <- as.data.frame(hc.dat)  
hc.dat <- rownames_to_column(hc.dat, var="ID")  
head(hc.dat)
```

```
##      ID a2D_HSD_starved_heads_46 a2D_HSD_starved_heads_47  
## 1 443 -0.1728428 -0.14359894  
## 2 2730 -0.3020037 -0.27682186  
## 3 528 -0.1684700 -0.34638619  
## 4 1643 -0.3030727 -0.20315288  
## 5 1303 -0.3117996 -0.20414891  
## 6 42002 0.3162049 0.05929058  
## a2D_HSD_starved_heads_48 a2D_HSD_starved_heads_49  
## 1 -0.09895506 -0.176892735  
## 2 -0.31118642 -0.239647306  
## 3 -0.39026832 0.001582905  
## 4 -0.26073366 -0.265421748  
## 5 -0.29571733 -0.290409850  
## 6 0.38839610 -0.059104350  
## a2D_HSD_starved_heads_50 a5D_HSD_starved_heads_36  
## 1 -0.16546694 -0.17410934  
## 2 -0.04816475 -0.24312742  
## 3 -0.11481845 0.07689252  
## 4 -0.11200641 -0.26435864  
## 5 -0.07295410 -0.26821532  
## 6 -0.17509488 0.67536415  
## a5D_HSD_starved_heads_37 a5D_HSD_starved_heads_38  
## 1 -0.16611664 -0.1836369  
## 2 -0.27156232 -0.2968839  
## 3 -0.05426125 -0.1226896  
## 4 -0.20310416 -0.2831909  
## 5 -0.21220910 -0.2870056  
## 6 0.50615046 0.2086612  
## a5D_HSD_starved_heads_39 a7D_HSD_starved_heads_16  
## 1 -0.1693590 -0.005478764  
## 2 -0.2373643 0.159419447  
## 3 -0.1304409 0.609731683  
## 4 -0.2401268 0.102311555  
## 5 -0.2527088 0.113206266
```

```

## 6          0.4688693          -0.324635849
## a7D_HSD_starved_heads_17 a7D_HSD_starved_heads_18
## 1          -0.13255520          -0.1337317
## 2           0.05691252           0.2871835
## 3           0.52939804           0.4608432
## 4           0.31811407           0.5513006
## 5           0.27382943           0.5573779
## 6          -0.32463585          -0.2072926
## a7D_HSD_starved_heads_19 a7D_HSD_starved_heads_20 a7D_ND_starved_heads_1
## 1          -0.12859849          -0.14588918           0.61780671
## 2           0.08541038          -0.03533759           0.38701026
## 3           0.24304819           0.50538878          -0.37663334
## 4           0.69692730           0.54161350          -0.07937683
## 5           0.63841366           0.68820041          -0.07142693
## 6          -0.32463585          -0.24567958          -0.32463585
## a7D_ND_starved_heads_2 a7D_ND_starved_heads_3
## 1           0.563061952           0.81636305
## 2           0.688813583           0.59734977
## 3          -0.358466412          -0.36445095
## 4          -0.007503021           0.01178065
## 5          -0.026995208           0.02256298
## 6          -0.324635849          -0.31258612

```

```

hc.dat2 <- dplyr::inner_join(orderedbycluster,hc.dat,by="ID")
head(hc.dat2)

```

```

## ID a2D_HSD_starved_heads_46 a2D_HSD_starved_heads_47
## 1 1898          -0.277904028          -0.25393925
## 2 34398         -0.265825463          -0.26582546
## 3 1437          -0.417687162          -0.29171593
## 4 37063         -0.219964596          -0.27359105
## 5 1124           0.007957584          -0.07249855
## 6 34409         -0.147918636          -0.21484264
## a2D_HSD_starved_heads_48 a2D_HSD_starved_heads_49
## 1          -0.33434691          -0.02327213
## 2          -0.26582546           0.03888608
## 3          -0.19799695          -0.14285043
## 4          -0.25875410           0.11947575
## 5          -0.15240503           0.06995387
## 6           0.03300359           0.20893205
## a2D_HSD_starved_heads_50 a5D_HSD_starved_heads_36
## 1           0.03929905           0.074909353
## 2           0.24843432           0.136287794
## 3           0.25269840          -0.118254405
## 4           0.39196724          -0.170546939
## 5           0.04430222           0.093854743
## 6           0.07352106           0.005360887
## a5D_HSD_starved_heads_37 a5D_HSD_starved_heads_38
## 1          -0.19020717          -0.2898354
## 2          -0.04150528          -0.2658255
## 3          -0.24754034          -0.4128003
## 4          -0.21809241          -0.1688492
## 5          -0.11710309          -0.3003844
## 6          -0.13375522          -0.2696319
## a5D_HSD_starved_heads_39 a7D_HSD_starved_heads_16

```

```

## 1          -0.009689419          0.214495861
## 2          -0.265825463          0.002983666
## 3          -0.098797971          0.346529306
## 4          -0.167747880          0.155456606
## 5          -0.112590229         -0.163059713
## 6          -0.175947434         -0.114531990
##   a7D_HSD_starved_heads_17 a7D_HSD_starved_heads_18
## 1              0.27682113              0.2874203
## 2             -0.05015858              0.5628068
## 3              0.03305987              0.5823128
## 4              0.08261241              0.7264090
## 5             -0.12559616              0.6505748
## 6             -0.06722408              0.6184366
##   a7D_HSD_starved_heads_19 a7D_HSD_starved_heads_20 a7D_ND_starved_heads_1
## 1              0.6656531              0.6292415             -0.2932715
## 2              0.4946944              0.7341745             -0.2658255
## 3              0.4801918              0.3943653             -0.1350361
## 4              0.4426294              0.1610358             -0.2222147
## 5              0.6196118              0.4254092             -0.3494252
## 6              0.5572126              0.3614529             -0.1783165
##   a7D_ND_starved_heads_2 a7D_ND_starved_heads_3
## 1             -0.23724376             -0.27813068
## 2             -0.26582546             -0.26582546
## 3              0.05493536             -0.08141329
## 4             -0.21160974             -0.16821553
## 5             -0.34722437             -0.17137735
## 6             -0.17418801             -0.38156335

```

```

newDF <- hc.dat2 %>%
  mutate(mean_OND = rowMeans(select(.,a7D_ND_starved_heads_1:a7D_ND_starved_heads_3))) %>%
  mutate(mean_2D = rowMeans(select(.,a2D_HSD_starved_heads_46:a2D_HSD_starved_heads_50))) %>%
  mutate(mean_5D = rowMeans(select(.,a5D_HSD_starved_heads_36:a5D_HSD_starved_heads_39))) %>%
  mutate(mean_7D = rowMeans(select(.,a7D_HSD_starved_heads_16:a7D_HSD_starved_heads_20)))

```

```
head(newDF)
```

```

##      ID a2D_HSD_starved_heads_46 a2D_HSD_starved_heads_47
## 1  1898          -0.277904028          -0.25393925
## 2  34398         -0.265825463          -0.26582546
## 3   1437         -0.417687162          -0.29171593
## 4  37063         -0.219964596          -0.27359105
## 5   1124           0.007957584          -0.07249855
## 6  34409         -0.147918636          -0.21484264
##   a2D_HSD_starved_heads_48 a2D_HSD_starved_heads_49
## 1             -0.33434691             -0.02327213
## 2             -0.26582546              0.03888608
## 3             -0.19799695             -0.14285043
## 4             -0.25875410              0.11947575
## 5             -0.15240503              0.06995387
## 6              0.03300359              0.20893205
##   a2D_HSD_starved_heads_50 a5D_HSD_starved_heads_36
## 1              0.03929905              0.074909353
## 2              0.24843432              0.136287794
## 3              0.25269840             -0.118254405

```

```

## 4          0.39196724          -0.170546939
## 5          0.04430222          0.093854743
## 6          0.07352106          0.005360887
##   a5D_HSD_starved_heads_37 a5D_HSD_starved_heads_38
## 1          -0.19020717          -0.2898354
## 2          -0.04150528          -0.2658255
## 3          -0.24754034          -0.4128003
## 4          -0.21809241          -0.1688492
## 5          -0.11710309          -0.3003844
## 6          -0.13375522          -0.2696319
##   a5D_HSD_starved_heads_39 a7D_HSD_starved_heads_16
## 1          -0.009689419          0.214495861
## 2          -0.265825463          0.002983666
## 3          -0.098797971          0.346529306
## 4          -0.167747880          0.155456606
## 5          -0.112590229          -0.163059713
## 6          -0.175947434          -0.114531990
##   a7D_HSD_starved_heads_17 a7D_HSD_starved_heads_18
## 1          0.27682113          0.2874203
## 2          -0.05015858          0.5628068
## 3          0.03305987          0.5823128
## 4          0.08261241          0.7264090
## 5          -0.12559616          0.6505748
## 6          -0.06722408          0.6184366
##   a7D_HSD_starved_heads_19 a7D_HSD_starved_heads_20 a7D_ND_starved_heads_1
## 1          0.6656531          0.6292415          -0.2932715
## 2          0.4946944          0.7341745          -0.2658255
## 3          0.4801918          0.3943653          -0.1350361
## 4          0.4426294          0.1610358          -0.2222147
## 5          0.6196118          0.4254092          -0.3494252
## 6          0.5572126          0.3614529          -0.1783165
##   a7D_ND_starved_heads_2 a7D_ND_starved_heads_3   mean_OND   mean_2D
## 1          -0.23724376          -0.27813068 -0.26954863 -0.170032652
## 2          -0.26582546          -0.26582546 -0.26582546 -0.102031198
## 3          0.05493536          -0.08141329 -0.05383799 -0.159510415
## 4          -0.21160974          -0.16821553 -0.20067998 -0.048173351
## 5          -0.34722437          -0.17137735 -0.28934231 -0.020537982
## 6          -0.17418801          -0.38156335 -0.24468928 -0.009460915
##   mean_5D   mean_7D
## 1 -0.1037057 0.4147264
## 2 -0.1092171 0.3489002
## 3 -0.2193483 0.3672918
## 4 -0.1813091 0.3136286
## 5 -0.1090557 0.2813880
## 6 -0.1434934 0.2710692

```

```

newDF <- newDF %>%
  select(ID,mean_OND,mean_2D,mean_5D,mean_7D) ## make a new dataframe that only has ave numbers
head(newDF)

```

```

##   ID   mean_OND   mean_2D   mean_5D   mean_7D
## 1 1898 -0.26954863 -0.170032652 -0.1037057 0.4147264
## 2 34398 -0.26582546 -0.102031198 -0.1092171 0.3489002
## 3 1437 -0.05383799 -0.159510415 -0.2193483 0.3672918

```

```
## 4 37063 -0.20067998 -0.048173351 -0.1813091 0.3136286
## 5 1124 -0.28934231 -0.020537982 -0.1090557 0.2813880
## 6 34409 -0.24468928 -0.009460915 -0.1434934 0.2710692
```

```
rownames(newDF) <- newDF[,1] ## make row 1 names
newDF[,1] <- NULL ## remove IDs
head(newDF)
```

```
##          mean_OND      mean_2D      mean_5D      mean_7D
## 1898  -0.26954863 -0.170032652 -0.1037057 0.4147264
## 34398 -0.26582546 -0.102031198 -0.1092171 0.3489002
## 1437  -0.05383799 -0.159510415 -0.2193483 0.3672918
## 37063 -0.20067998 -0.048173351 -0.1813091 0.3136286
## 1124  -0.28934231 -0.020537982 -0.1090557 0.2813880
## 34409 -0.24468928 -0.009460915 -0.1434934 0.2710692
```

```
include_list <- c("18374", "1604", "37465")
plottingdata <- data.frame(t(newDF[include_list, ]))
```

```
plottingdata <- rownames_to_column(plottingdata, var="State")
```

```
## add color names
```

```
# x <- plottingdata$State ## Diets
# y <- plottingdata$`X18374` ## Compound ID
# plot_data <- data.frame(x, y)
```

```
##ggplot(data=plottingdata,aes(y=X18374,x=State,group=1)) +
# geom_line()+
# geom_point()
```

```
library(reshape2)
long <- melt(plottingdata)
head(long)
```

```
##      State variable      value
## 1 mean_OND      X18374 -0.07781772
## 2 mean_2D      X18374 0.21470663
## 3 mean_5D      X18374 0.17071984
## 4 mean_7D      X18374 -0.30459188
## 5 mean_OND      X1604 -0.25155065
## 6 mean_2D      X1604 0.15870252
```

```
ggplot(long, aes(x=State, y=value, group=variable)) +
  geom_line()
```

```
#Add colors based on compound class
```

### **Supplementary Note 3**

R code used for statistical analysis of RNA-sequencing data.

# RNA-sequencing analysis by DESeq2

Load libraries make directories

```
library("DESeq2")
```

```
## Loading required package: S4Vectors
## Loading required package: stats4
## Loading required package: BiocGenerics
## Loading required package: parallel
##
## Attaching package: 'BiocGenerics'
## The following objects are masked from 'package:parallel':
##
##   clusterApply, clusterApplyLB, clusterCall, clusterEvalQ,
##   clusterExport, clusterMap, parApply, parCapply, parLapply,
##   parLapplyLB, parRapply, parSapply, parSapplyLB
## The following objects are masked from 'package:stats':
##
##   IQR, mad, sd, var, xtabs
## The following objects are masked from 'package:base':
##
##   anyDuplicated, append, as.data.frame, basename, cbind,
##   colMeans, colnames, colSums, dirname, do.call, duplicated,
##   eval, evalq, Filter, Find, get, grep, grepl, intersect,
##   is.unsorted, lapply, lengths, Map, mapply, match, mget, order,
##   paste, pmax, pmax.int, pmin, pmin.int, Position, rank, rbind,
##   Reduce, rowMeans, rownames, rowSums, sapply, setdiff, sort,
##   table, tapply, union, unique, unsplit, which, which.max,
##   which.min
##
## Attaching package: 'S4Vectors'
## The following object is masked from 'package:base':
##
##   expand.grid
## Loading required package: IRanges
##
## Attaching package: 'IRanges'
## The following object is masked from 'package:grDevices':
##
##   windows
## Loading required package: GenomicRanges
## Loading required package: GenomeInfoDb
```

```
## Loading required package: SummarizedExperiment
## Loading required package: Biobase
## Welcome to Bioconductor
##
##   Vignettes contain introductory material; view with
##   'browseVignettes()'. To cite Bioconductor, see
##   'citation("Biobase")', and for packages 'citation("pkgname)".
## Loading required package: DelayedArray
## Loading required package: matrixStats
##
## Attaching package: 'matrixStats'
## The following objects are masked from 'package:Biobase':
##
##   anyMissing, rowMedians
## Loading required package: BiocParallel
##
## Attaching package: 'DelayedArray'
## The following objects are masked from 'package:matrixStats':
##
##   colMaxs, colMins, colRanges, rowMaxs, rowMins, rowRanges
## The following objects are masked from 'package:base':
##
##   aperm, apply
library("ggplot2")
library("tibble")
library("dplyr")
##
## Attaching package: 'dplyr'
## The following object is masked from 'package:matrixStats':
##
##   count
## The following object is masked from 'package:Biobase':
##
##   combine
## The following objects are masked from 'package:GenomicRanges':
##
##   intersect, setdiff, union
## The following object is masked from 'package:GenomeInfoDb':
##
##   intersect
## The following objects are masked from 'package:IRanges':
##
##   collapse, desc, intersect, setdiff, slice, union
## The following objects are masked from 'package:S4Vectors':
##
```



```

##      first, intersect, rename, setdiff, setequal, union
## The following objects are masked from 'package:BiocGenerics':
##
##      combine, intersect, setdiff, union
## The following objects are masked from 'package:stats':
##
##      filter, lag
## The following objects are masked from 'package:base':
##
##      intersect, setdiff, setequal, union

#library("pheatmap")
#library("RColorBrewer")
library(EnhancedVolcano)

## Loading required package: ggrepel
dir.create("analysis")

## Warning in dir.create("analysis"): 'analysis' already exists
dir.create("analysis/plots")

## Warning in dir.create("analysis/plots"): 'analysis\plots' already exists

Load data
FILES_CD_brains_refedVsfasted <- c(
"91819_AGTGAG_S18_R1_ReadsPerGene.out.tab", ## CD refed
"91826_AGCATG_S25_R1_ReadsPerGene.out.tab", ## CD refed
"91827_GAGTCA_S26_R1_ReadsPerGene.out.tab", ## CD refed
"91822_GTGCTT_S21_R1_ReadsPerGene.out.tab", ## CD fasted
"91823_AAGCCT_S22_R1_ReadsPerGene.out.tab", ## CD fasted
"91830_CACAGT_S29_R1_ReadsPerGene.out.tab" ## CD fasted
)
FILES_CD_brains_satedVsfasted <- c(
  "91820_GCACTA_S19_R1_ReadsPerGene.out.tab", ## CD sated
  "91821_ACCTCA_S20_R1_ReadsPerGene.out.tab", ## CD sated
  "91828_CGTAGA_S27_R1_ReadsPerGene.out.tab", ## CD sated
  "91822_GTGCTT_S21_R1_ReadsPerGene.out.tab", ## CD fasted
  "91823_AAGCCT_S22_R1_ReadsPerGene.out.tab", ## CD fasted
  "91830_CACAGT_S29_R1_ReadsPerGene.out.tab" ## CD fasted
)
FILES_CD_brains_refedVssated <- c(
"91819_AGTGAG_S18_R1_ReadsPerGene.out.tab", ## CD refed
"91826_AGCATG_S25_R1_ReadsPerGene.out.tab", ## CD refed
"91827_GAGTCA_S26_R1_ReadsPerGene.out.tab", ## CD refed
"91820_GCACTA_S19_R1_ReadsPerGene.out.tab", ## CD sated
"91821_ACCTCA_S20_R1_ReadsPerGene.out.tab", ## CD sated
"91828_CGTAGA_S27_R1_ReadsPerGene.out.tab" ## CD sated
)

italize data.frames
CD_brains_refedVsfasted <- read.table(FILES_CD_brains_refedVsfasted[1])
CD_brains_satedVsfasted <- read.table(FILES_CD_brains_satedVsfasted[1])

```

```
CD_brains_refedVssated<- read.table(FILESD_brains_refedVssated[1])
```

keep only IDs

```
CD_brains_refedVsfasted <- dplyr::select(CD_brains_refedVsfasted,"V1")
CD_brains_satedVsfasted <- dplyr::select(CD_brains_satedVsfasted,"V1")
CD_brains_refedVssated <- dplyr::select(CD_brains_refedVssated,"V1")
```

rename column name

```
colnames(CD_brains_refedVsfasted) <- c("ID")
colnames(CD_brains_satedVsfasted) <- c("ID")
colnames(CD_brains_refedVssated) <- c("ID")
```

Read data from files in loop (CD\_brains\_refedVsfasted)

```
for(file_name in FILESD_brains_refedVsfasted) {
  tmp <- read.table(file_name)
  colnames(tmp) <- c("ID","one",file_name,"three")
  tmp <- dplyr::select(tmp,"ID",file_name)
  CD_brains_refedVsfasted <- dplyr::full_join(CD_brains_refedVsfasted,tmp,by="ID")
}
```

remove following rows

```
CD_brains_refedVsfasted <- CD_brains_refedVsfasted %>%
  filter(ID!="N_unmapped") %>%
  filter(ID!="N_multimapping") %>%
  filter(ID!="N_noFeature") %>%
  filter(ID!="N_ambiguous")
```

Read data from files in loop (CD\_brains\_satedVsfasted)

```
for(file_name in FILESD_brains_satedVsfasted) {
  tmp <- read.table(file_name)
  colnames(tmp) <- c("ID","one",file_name,"three")
  tmp <- dplyr::select(tmp,"ID",file_name)
  CD_brains_satedVsfasted <- dplyr::full_join(CD_brains_satedVsfasted,tmp,by="ID")
}
```

remove following rows

```
CD_brains_satedVsfasted <- CD_brains_satedVsfasted %>%
  filter(ID!="N_unmapped") %>%
  filter(ID!="N_multimapping") %>%
  filter(ID!="N_noFeature") %>%
  filter(ID!="N_ambiguous")
```

Read data from files in loop (CD\_brains\_refedVssated)

```
for(file_name in FILESD_brains_refedVssated) {
  tmp <- read.table(file_name)
  colnames(tmp) <- c("ID","one",file_name,"three")
  tmp <- dplyr::select(tmp,"ID",file_name)
  CD_brains_refedVssated <- dplyr::full_join(CD_brains_refedVssated,tmp,by="ID")
}
```

remove following rows

```

CD_brains_refedVssated <- CD_brains_refedVssated %>%
  filter(ID!="N_unmapped") %>%
  filter(ID!="N_multimapping") %>%
  filter(ID!="N_noFeature") %>%
  filter(ID!="N_ambiguous")

```

Make ID row names

```

rownames(CD_brains_refedVsfasted) <- CD_brains_refedVsfasted[,1]
CD_brains_refedVsfasted[,1] <- NULL ## remove IDs
rownames(CD_brains_satedVsfasted) <- CD_brains_satedVsfasted[,1]
CD_brains_satedVsfasted[,1] <- NULL ## remove IDs
rownames(CD_brains_refedVssated) <- CD_brains_refedVssated[,1]
CD_brains_refedVssated[,1] <- NULL ## remove IDs

```

```

listofcountdatas <- list(
  CD_brains_refedVsfasted,
  CD_brains_satedVsfasted,
  CD_brains_refedVssated
)

```

Make column data file

```

condition <- c(
  "CD_refed",
  "CD_refed",
  "CD_refed",
  "CD_fasted",
  "CD_fasted",
  "CD_fasted"
)
CD_brains_refedVsfasted_colData <- as.data.frame(cbind(FILESDATA_CD_brains_refedVsfasted,condition))

condition <- c(
  "CD_sated",
  "CD_sated",
  "CD_sated",
  "CD_fasted",
  "CD_fasted",
  "CD_fasted"
)
CD_brains_satedVsfasted_colData <- as.data.frame(cbind(FILESDATA_CD_brains_satedVsfasted,condition))

condition <- c(
  "CD_refed",
  "CD_refed",
  "CD_refed",
  "CD_sated",
  "CD_sated",
  "CD_sated"
)
CD_brains_refedVssated_colData <- as.data.frame(cbind(FILESDATA_CD_brains_satedVsfasted,condition))

#rownames(CD_brains_refedVsfasted_colData) <- CD_brains_refedVsfasted_colData[,1]
#CD_brains_refedVsfasted_colData[,1] <- NULL ## remove IDs

```

```
#rownames(CD_brains_satedVsfasted_colData) <- CD_brains_satedVsfasted_colData[,1]
#CD_brains_satedVsfasted_colData[,1] <- NULL ## remove IDs
```

```
listofcoldatas <- list(
  CD_brains_refedVsfasted_colData,
  CD_brains_satedVsfasted_colData,
  CD_brains_refedVssated_colData
)
```

## DeSeq2

```
i<-0
for(dataname in listofcountdatas) {
  i<-i+1
  countData <- dataname
  colData <- as.data.frame(listofcoldatas[i])

  head(countData)
  colData
  rm(dds)
  dds <- DESeqDataSetFromMatrix(countData = countData,
                                colData = colData,
                                design = ~ condition)

  #filter rows with fewer than 10 counts per gene
  dim(dds)
  keep <- rowSums(counts(dds)) >= 10
  dds <- dds[keep,]
  dim (dds)

  #differential abundance
  dds <- DESeq(dds)
  res <- results(dds)
  #reorder based on padj
  res <- res[order(res$padj),]
  rld <- rlog(dds, blind=FALSE)
  #save data
  write.csv(as.data.frame(counts(dds,normalized=TRUE)), file=paste("analysis/Norm_counts_",colData$condition, ".csv", sep=""))
  #write.csv(as.data.frame(res), file=paste("analysis/Results_",i, ".csv", sep="'))

  ## PCA plot with data lables
  #pdf(paste("PCA_",i, ".pdf", sep="'))
  #pcaData <- plotPCA(rld,intgroup="condition", ntop=5000, returnData=TRUE)
  #ggplot(pcaData, aes(PC1, PC2, label = rownames(pcaData), color=condition)) +
  #geom_point(size=3) +
  #geom_text() +
  #labs(title=dataname)

  #plotPCA(rld,intgroup="condition",ntop=500) ## simple PCA plot w/o data lables
  #print(p)
  #ggsave(paste("PCA_",i, ".pdf", sep="'), plot = p, width= 10, height = 10)

  ## MA plot
```

```

pdf(paste("analysis/plots/MAplot_", colData$condition[1], "Vs", colData$condition[4], i, ".pdf", sep=''))
plotMA(res, ylim=c(-5,5))
dev.off()

## Volcano plot
IDtoNames <- read.table("IDtoNames.txt", header=T)
res2 <- as.data.frame(res)
res2 <- rownames_to_column(res2, var = "ID")
res2 <- dplyr::full_join(res2, IDtoNames, by="ID")
res3 <- na.omit(res2)
write.csv(as.data.frame(res3), file=paste("analysis/Results_", colData$condition[1], "Vs", colData$condition[4], i, ".csv", sep=''))

p <- EnhancedVolcano(res2,
  lab=res2$Name, x="log2FoldChange",
  y="padj",
  title = paste(colData$condition[1], " Vs ", colData$condition[4], sep=''),
  pCutoff = 0.05,
  FCcutoff = 1.5,
  legendPosition = 'bottom',
  colAlpha = 1,
  DrawConnectors = TRUE,
  widthConnectors = 0.2,
  colConnectors = 'grey30'
)
ggsave(paste("analysis/plots/volcano_", colData$condition[1], "Vs", colData$condition[4], i, ".pdf", sep=''))
}

```

```

## Warning in rm(dds): object 'dds' not found
## estimating size factors
## estimating dispersions
## gene-wise dispersion estimates
## mean-dispersion relationship
## final dispersion estimates
## fitting model and testing
## Warning: Column `ID` joining character vector and factor, coercing into
## character vector
## Warning: Removed 1777 rows containing missing values (geom_point).
## estimating size factors
## estimating dispersions
## gene-wise dispersion estimates
## mean-dispersion relationship
## -- note: fitType='parametric', but the dispersion trend was not well captured by the
## function: y = a/x + b, and a local regression fit was automatically substituted.
## specify fitType='local' or 'mean' to avoid this message next time.
## final dispersion estimates

```

```
## fitting model and testing
## Warning: Column `ID` joining character vector and factor, coercing into
## character vector
## Warning: Removed 3322 rows containing missing values (geom_point).
## estimating size factors
## estimating dispersions
## gene-wise dispersion estimates
## mean-dispersion relationship
## final dispersion estimates
## fitting model and testing
## Warning: Column `ID` joining character vector and factor, coercing into
## character vector
## Warning: Removed 226 rows containing missing values (geom_point).
## Warning: Removed 1 rows containing missing values (geom_text_repel).
```

## References

- 1 Dobson, A. J. *et al.* Nutritional Programming of Lifespan by FOXO Inhibition on Sugar-Rich Diets. *Cell Rep* **18**, 299-306, doi:10.1016/j.celrep.2016.12.029 (2017).
